# Supplementary material
Source: publisher figshare collection journal article supplement (https://acs.figshare.com/ndownloader/files/4179622)

**–Supporting Information for–**

**Polarity Reversal Catalysis in Radical Reductions of Halides by N-Heterocyclic**

**Carbene Boranes**

Xiangcheng Pan,<sup>a</sup> Emmanuel Lacôte,<sup>b</sup> Jacques Lalevée<sup>c</sup> and Dennis P. Curran<sup>a</sup>

<sup>a</sup>Department of Chemistry, University of Pittsburgh, Pittsburgh, PA 15260 USA

<sup>b</sup>ICSN CNRS, Avenue de la Terrasse, 91198 Gif-sur-Yvette Cedex, France

<sup>c</sup>Institut de Science des Matériaux de Mulhouse IS2M – LRC CNRS 7228 – ENSCMu-UHA; 15,

rue Jean Starcky, 68057 Mulhouse Cedex – France

jacques.lalevee@uha.fr, curran@pitt.edu

**Table of Contents**

|                                                             |    |
|-------------------------------------------------------------|----|
| General Remarks.....                                        | 2  |
| Experimental Procedures and Compound Characterization ..... | 3  |
| Additional Preparative Experiments .....                    | 13 |
| Mechanistic Studies .....                                   | 20 |
| Calculations.....                                           | 21 |
| References.....                                             | 29 |
| Copies of Spectra .....                                     | 31 |

**General Remarks:** All reagents were purchased commercially and used without further purification unless stated otherwise. Reaction mixtures were stirred with a magnetic stirrer and reaction progress was monitored by TLC with 0.25 mm E. Merck precoated silica gel plates. Flash chromatography was performed with silica gel 60 (particle size 0.040–0.063 mm) supplied by Sorbent Technologies or by CombiFlash system (Teledyne ISCO). NMR spectra were taken on a Bruker WH-300, a Bruker Avance<sup>TM</sup> 400 NMR, and a Bruker Avance<sup>TM</sup> 500 NMR spectrometer. Spectra were recorded at room temperature in the indicated deuteriated solvents, and chemical shifts were reported in parts per million (ppm) downfield relative to TMS using the residual solvent proton resonance of CDCl<sub>3</sub> (<sup>1</sup>H = 7.27 ppm, <sup>13</sup>C = 77.0 ppm) or C<sub>6</sub>D<sub>6</sub> (<sup>1</sup>H = 7.16 ppm, <sup>13</sup>C = 128.0 ppm) as the internal standard. The <sup>11</sup>B chemical shift are given relative to BF<sub>3</sub>•OEt<sub>2</sub> (<sup>11</sup>B = 0 ppm). In reporting spectral data, the following abbreviations are used: s = singlet, d = doublet, t = triplet, q = quartet, m = multiplet, dd = doublet of doublets, dt = doublet of triplets, td = triplet of doublets. The resonances of hydrogen atoms connected to the boron atom are not usually observed in <sup>1</sup>H NMR spectra because of quadrupole broadening.<sup>1</sup> Infrared spectra were taken on a Mattson Genesis Series FTIR using thin film on NaCl plate. Peaks are reported in wave numbers (cm<sup>-1</sup>). High resolution mass spectra (HRMS) were obtained on a Q-Tof Ultima API, Micromass UK Limited instrument by electrospray ionization (ESI).

Compounds **1**<sup>2</sup>, **6**<sup>3</sup>, **8a**<sup>4</sup>, **8b**<sup>4</sup>, **10a**<sup>5</sup>, **10b**<sup>6</sup>, **14a**<sup>7</sup>, **19**<sup>8</sup>, **21**,<sup>19</sup> **23a**<sup>9</sup>, **23b**<sup>10</sup> have been prepared according to the literature procedures. Their spectroscopic data were consistent with those previous reported.

*Caution:* Radical initiators (AIBN, DTBP, TBHN) are high energy compounds that should be handled with appropriate precautions.

## Experimental Procedures and Compound Characterization:

**General Procedure for Triethylborane-initiated Free Radical Reactions:** Triethylborane (1 M solution in hexane, 0.05 mmol) was added to a solution of diMe-Imd-BH<sub>3</sub> **1** (12 mg, 0.11 mmol) and the substrate (0.1 mmol) in benzene (0.45 mL). Thiophenol or *tert*-dodecanethiol (11.0 mg, 0.1 mmol or 20.2 mg, 0.1 mmol) was dissolved in benzene (1 mL). The diluted thiol solution (0.1 M in benzene, 50  $\mu$ L, 0.005 mmol) was added to the solution of the substrate and triethylborane. The septum was pierced with a needle to admit ambient air. The colorless solution was stirred for 1-5 h. Then the solvent was evaporated and the crude product was purified by flash column chromatography.

**General Procedure for TBHN-initiated Free Radical Reactions:** TBHN (3.5 mg, 0.02 mmol) was added to a solution of diMe-Imd-BH<sub>3</sub> **1** (12 mg, 0.11 mmol) and the substrate (0.1 mmol) in benzene (0.45 mL). Thiophenol or *tert*-dodecanethiol (11.0 mg, 0.1 mmol or 20.2 mg, 0.1 mmol) was dissolved in benzene (1 mL). The diluted thiol solution (0.1 M in benzene, 50  $\mu$ L, 0.005 mmol) was added to the solution of the substrate and TBHN. The colorless solution was charged to a sealed tube and heated in oil bath at 80 °C for 2 h. The mixture was cooled to room temperature, then the solvent was evaporated and the crude product was purified by flash column chromatography.

**General Procedure for DTBP-initiated Free Radical Reactions:** DTBP (2.9 mg, 0.02 mmol) was added to a solution of diMe-Imd-BH<sub>3</sub> **1** (12 mg, 0.11 mmol) and the substrate (0.1 mmol) in benzene (0.45 mL). Thiophenol or *tert*-dodecanethiol (11.0 mg, 0.1 mmol or 20.2 mg, 0.1 mmol)

was dissolved in benzene (1 mL). The diluted thiol solution (0.1 M in benzene, 50  $\mu$ L, 0.005 mmol) was added to the solution of the substrate and DTBP. The colorless solution was charged to a NMR tube and irradiated with GE-275W sunlamp at 60 °C for 1-7 h. The mixture was cooled to room temperature, then the solvent was evaporated and the crude product was purified by flash column chromatography.

**General Procedure for Free Radical Reactions with DiMe-Tri-BH<sub>3</sub>, 2:** TBHN (3.5 mg, 0.02 mmol) was added to a solution of diMe-Tri-BH<sub>3</sub> **2** (12 mg, 0.11 mmol) and the substrate (0.1 mmol) in benzene (0.45 mL). Thiophenol (11.0 mg, 0.1 mmol) was dissolved in benzene (1 mL). The diluted thiol solution (0.1 M in benzene, 50  $\mu$ L, 0.005 mmol) was added to the solution of the substrate and TBHN. The colorless solution was charged to a sealed tube and heated in oil bath at 80 °C for 2 h. The mixture was cooled to room temperature, then ether and water (20 mL, respectively) were added to the mixture, and the organic layer was extracted with water (2  $\times$  20 mL). The organic layer was washed with brine, dried over Na<sub>2</sub>SO<sub>4</sub>, and concentrated in *vacuo* to get the product.

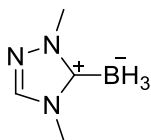

**2,4-Dimethyl-1,2,4-triazol-3-ylideneborane (diMe-Tri-BH<sub>3</sub>, 2):** The preparation this compound followed literature procedures<sup>11</sup> with some revisions: A mixture of 1,2,4-triazole (10.0 g, 0.145 mol), iodomethane (61.8 g, 0.435 mol), and potassium carbonate (30.0 g, 0.217 mol) in acetonitrile (80 mL) and methanol (20 mL) was heated at 40 °C for 3 days. The white mixture was filtered with a Buckner funnel, and the white solid was washed with CH<sub>2</sub>Cl<sub>2</sub>. The filtrate was concentrated to give 2,4-dimethyl-1,2,4-triazolium iodide (white solid, 32.8 g,

100%) . A solution of NaHMDS (1 M in THF, 110 mL, 0.11 mol) was added to a suspension of an imidazolium salt (22.5 g, 0.1 mol) in THF (100 mL) and CH<sub>2</sub>Cl<sub>2</sub> (50 mL) at –78 °C under argon. After stirring of the reaction mixture for 1 h at –78 °C, a solution of BH<sub>3</sub>-THF (1 M in THF, 110 mL, 0.11 mol) was added. The resulting mixture was warmed from –78 °C to rt and stirred for 2 days. The residue was dried in *vacuo* and purified by flash column chromatography (silica gel) to give the title compound (4.4 g, 40%) as a white solid, mp 60–62 °C; <sup>1</sup>H NMR (CDCl<sub>3</sub>, 300 MHz) δ 7.88 (s, 1 H), 3.97 (s, 3 H), 3.77 (s, 3 H), 1.03 (q, *J*<sub>B-H</sub> = 88 Hz, 3 H); <sup>11</sup>B NMR (CDCl<sub>3</sub>, 96.3 MHz) δ –37.8 (q, *J*<sub>B-H</sub> = 88 Hz). These data are consistent with the previously reported characterization.<sup>11</sup> Crystals of pure diMe-Tri-BH<sub>3</sub> were obtained by vaporizing the solvent (CH<sub>2</sub>Cl<sub>2</sub>) of the solution of the complex.

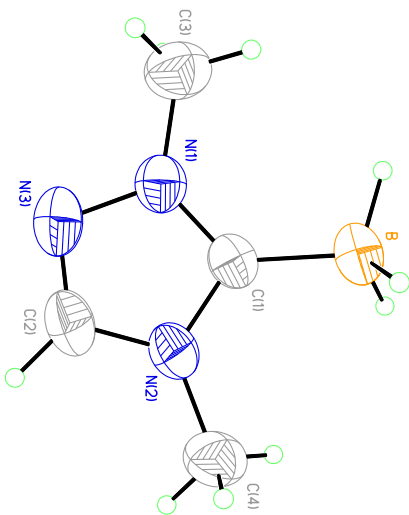

**Figure S1.** ORTEP plot of diMe-Tri-BH<sub>3</sub> 3.

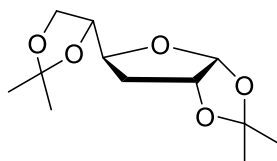

**Di-*O*-isopropylidene glucofuranose (7):** General conditions were used to yield the title compound as a colorless oil:  $^1\text{H}$  NMR ( $\text{C}_6\text{D}_6$ , 400 MHz):  $\delta$  5.58 (d,  $J = 3.6$  Hz, 1H), 4.31–4.26 (m, 1H), 4.20–4.18 (m, 1H), 3.91–3.89 (m, 2H), 3.82–3.81 (m, 1H), 2.18 (dd,  $J = 4.4, 9.2$  Hz, 1H), 1.45 (s, 3H), 1.37 (s, 3H), 1.26 (s, 3H), 1.13 (s, 3H). These data are consistent with the previously reported characterization.<sup>12</sup>

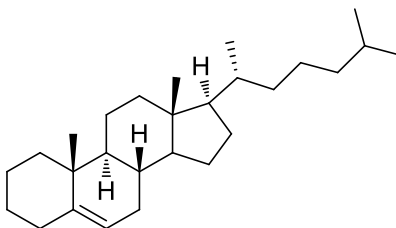

**Cholest-5-ene (9):** General conditions were used to yield the title compound as a white solid:  $^1\text{H}$  NMR ( $\text{CDCl}_3$ , 400 MHz)  $\delta$  5.29–5.27 (m, 1H), 2.28–2.20 (m, 1H), 2.00–1.99 (m, 3H), 1.85–1.82 (m, 2H), 1.75–1.72 (m, 1H), 1.62–0.93 (m, 26H), 0.92, (d,  $J = 6.4$  Hz, 3H), 0.87 (dd,  $J = 6.8, 4.8$  Hz, 6H), 0.68 (s, 3H). These data are consistent with the previously reported characterization.<sup>13</sup>

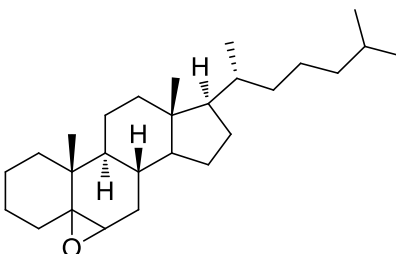

**5,6-Epoxycholestane (11):** General conditions were used to yield the title compound (two isomers 6:1) as a white solid:  $^1\text{H}$  NMR ( $\text{CDCl}_3$ , 300 MHz) 5 $\alpha$ ,6 $\alpha$ -epoxycholestane  $\delta$  2.88 (d,  $J$

=4.5 Hz, 1H), 0.61 (s, 3H); 5 $\beta$ ,6 $\beta$ -epoxycholestane  $\delta$  3.01 (m, 1H), 0.63 (s, 3H); overlapping signals:  $\delta$  2.15–0.85 (m, 42H). These data are consistent with the previously reported characterization.<sup>14</sup>

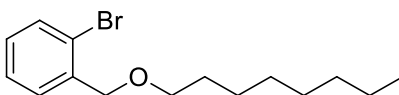

**1-Bromo-2-((octyloxy)methyl)benzene (14b):** Sodium hydride (60%, 0.43 g, 10.7 mmol) was added to a solution of 1-bromooctane (2.1 g, 10.7 mmol) and 2-bromobenzyl alcohol (1.0 g, 5.3 mmol) in DMF (10 mL). The mixture was heated at 70 °C for 2 h. The mixture was cooled to room temperature, then and quenched by water (30 mL) and diethyl ether (70 mL). The organic layer was extracted with water, and washed with brine, dried over MgSO<sub>4</sub> and concentrated in *vacuo*. The crude product was purified by flash column chromatography to give the title compound (1.5 g, 94%) as a colorless oil: <sup>1</sup>H NMR (400 MHz, CDCl<sub>3</sub>)  $\delta$  7.55–7.49 (m, 2H), 7.33 (t, *J* = 7.2 Hz, 1H), 7.15 (t, *J* = 7.2 Hz, 1H), 4.58 (s, 2H), 3.56 (t, *J* = 6.8 Hz, 2H), 1.71–1.60 (m, 2H), 1.43–1.31 (m, 10H), 0.90 (t, *J* = 6.8 Hz, 3H); <sup>13</sup>C NMR (100 MHz, CDCl<sub>3</sub>)  $\delta$  138.0, 132.4, 128.9, 128.7, 127.3, 122.6, 72.0, 71.0, 31.8, 29.7, 29.4, 29.2, 26.2, 22.6, 14.1; FTIR (thin film, CH<sub>2</sub>Cl<sub>2</sub>, cm<sup>-1</sup>) 3065, 2926, 2855, 1570, 1466, 1357, 1104, 749; HRMS (ESI) *m/z* (*M*<sup>+</sup> + H) calculated for C<sub>15</sub>H<sub>23</sub><sup>79</sup>BrO 299.1011, found 299.1023.

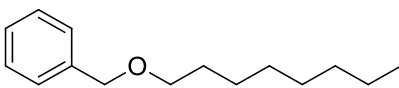

**((Octyloxy)methyl)benzene (15):** General conditions were used to yield the title compound as a colorless oil: <sup>1</sup>H NMR (CDCl<sub>3</sub>, 400 MHz):  $\delta$  7.35–7.26 (m, 5H), 4.50 (s, 2H), 3.46 (t, *J* = 6.7 Hz,

2H), 1.70–1.59 (m, 2H), 1.43–1.30 (m, 2H), 1.30–1.15 (m, 8H), 0.88 (t,  $J = 6.9$  Hz, 3H). These data are consistent with the previously reported characterization.<sup>7</sup>

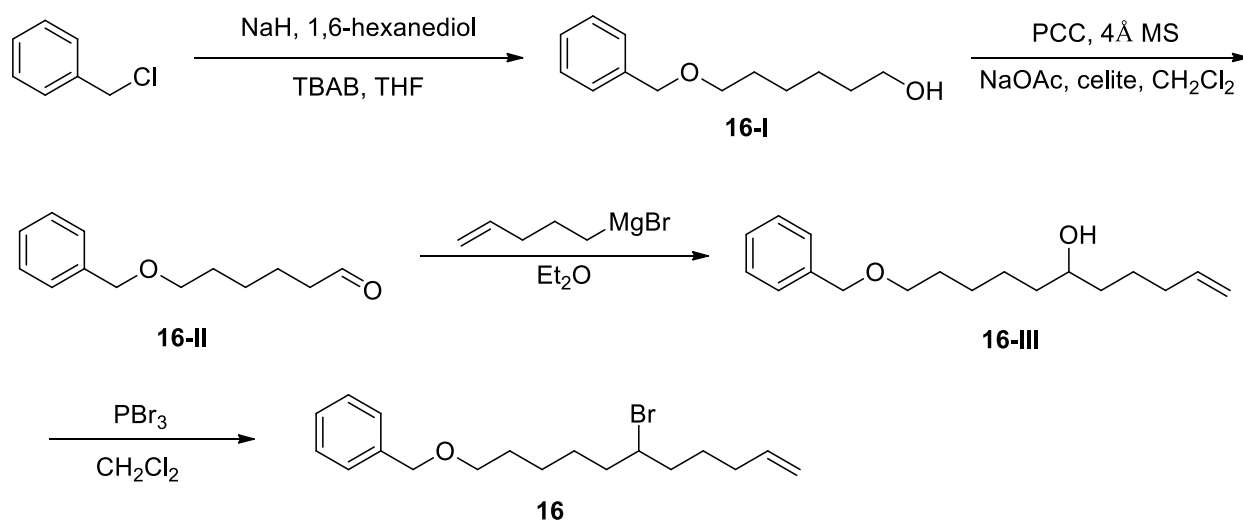

**6-(Benzyloxy)hexan-1-ol (16-I):** Sodium hydride (60%, 0.96 g, 24.0 mmol) was added to the gray mixture of 1,6-hexanediol (2.36 g, 20.0 mmol), benzyl chloride (3.04 g, 24.0 mmol), and tetrabutylammonium bromide (1.60 g, 5.0 mmol) in THF (30 mL). The white mixture was refluxed for 2 h. The mixture was cooled to room temperature, and then quenched by water (30 mL) and diethyl ether (50 mL). The organic layer was extracted with water, and washed with brine, dried over MgSO<sub>4</sub> and concentrated in *vacuo*. The crude product was purified by flash column chromatography to give the title compound (2.40 g, 57%) as a colorless oil: <sup>1</sup>H NMR (400 MHz, CDCl<sub>3</sub>) δ 7.3–7.29 (m, 5H), 4.51 (s, 2H), 3.65 (t,  $J = 6.4$  Hz, 2H), 3.48 (t,  $J = 6.8$  Hz, 2H), 1.68–1.58 (m, 4H), 1.55–1.39 (m, 4H). These <sup>1</sup>H NMR data are consistent with the previously reported characterization.<sup>15</sup>



**6-(Benzyloxy)hexanal (16-II):** CH<sub>2</sub>Cl<sub>2</sub> solution (20 mL) of 6-(benzyloxy)hexan-1-ol **16-I** (2.37 g, 11.4 mmol) was added to the orange mixture of PCC (pyridinium chlorochromate, 4.90 g, 22.8 mmol), 4 Å MS (2.40 g), sodium acetate (0.56 g, 6.84 mmol), and celite (2.40 g) in 70 mL of CH<sub>2</sub>Cl<sub>2</sub>. The brown mixture was stirred at rt for 2 h, and celite (30 g) and diethyl ether (100 mL) were added. The brown mixture was filtered through a plug of silica gel, and concentrate in *vacuo*. The crude product was purified by flash column chromatography to give the title compound (1.55 g, 66%) as a colorless oil: <sup>1</sup>H NMR (300 MHz, CDCl<sub>3</sub>) δ 9.76 (t, *J* = 1.5 Hz, 1H), 7.35–7.27 (m, 5H), 4.50 (s, 2H), 3.47 (t, *J* = 6.3 Hz, 2H), 2.43 (td, *J* = 7.5, 1.8 Hz, 2H), 1.68–1.61 (m, 4H), 1.45–1.39 (m, 2H). These <sup>1</sup>H NMR data are consistent with the previously reported characterization.<sup>16</sup>

**11-(Benzyloxy)undec-1-en-6-ol (16-III):** 1,2-Dibromoethane (0.36 g, 1.9 mmol) was added to the mixture of Mg turnings (0.27 g, 10.9 mmol) in ethyl ether (0.8 mL) to activate the Mg turnings. After the generation of bubbles was ceased, the solution of 5-bromo-1-pentene (1.27 g, 8.4 mmol) in ethyl ether (13 mL) was added slowly over 30 min. The Grignard reagent was stirred at rt for 2 h, and then the Grignard reagent was added to a solution of 6-(benzyloxy)hexanal (**16-II**, 1.46 g, 7.0 mmol) in THF (5 mL) at –78 °C slowly. The white mixture was stirred at –78 °C to 0 °C for 3 h, and then saturated NH<sub>4</sub>Cl (aq) (10 mL) was added to the white mixture to quench the excess Grignard reagent. The biphasic system was partitioned between ethyl ether (70 mL) and saturated NH<sub>4</sub>Cl (aq) (30 mL). The organic layer was washed with water (30 mL), brine (30 mL), dried with MgSO<sub>4</sub>, and concentrated to give title compound (0.82 g, 56%) as a colorless oil: <sup>1</sup>H NMR (300 MHz, CDCl<sub>3</sub>) δ 7.37–7.28 (m, 5H), 5.82 (ddt, *J* = 17.2, 10.3, 6.6 Hz, 1H), 5.06–4.94 (m, 2H), 4.51 (s, 2H), 3.60 (m, 1H), 3.48 (t, *J* = 6.6 Hz, 2H),

2.10–2.05 (m, 2H), 1.67–1.30 (m, 12H);  $^{13}\text{C}$  NMR (100 MHz,  $\text{CDCl}_3$ )  $\delta$  138.7, 138.6, 128.3, 127.6, 127.5, 114.6, 72.8, 71.7, 70.3, 37.4, 36.8, 33.7, 29.7, 26.2, 25.4, 24.9; FTIR (thin film,  $\text{CH}_2\text{Cl}_2$ ,  $\text{cm}^{-1}$ ) 3405, 2933, 2858, 1640, 1454, 1363, 1101, 910, 736; HRMS (ESI)  $m/z$  ( $\text{M}^+ + \text{Na}$ ) calculated for  $\text{C}_{18}\text{H}_{28}\text{O}_2\text{Na}$  299.1987, found 299.2008.

**(((6-Bromoundec-10-en-1-yl)oxy)methyl)benzene (16):** Phosphorus tribromide (0.73 g, 2.72 mmol) was added to a  $\text{CH}_2\text{Cl}_2$  solution of 11-(benzyloxy)undec-1-en-6-ol (**16-III**, 0.50 g, 1.81 mmol) at 0 °C. The colorless solution was stirred at 0 °C for 1 h, and then diluted with ethyl ether (70mL) and washed saturated  $\text{NaHCO}_3$  (aq)(x4). The organic layer was dried with  $\text{MgSO}_4$ , and concentrated to give a colorless oil. The crude product was purified by flash column chromatography to give the title compound (0.13 g, 21%) as a colorless oil:  $^1\text{H}$  NMR (300 MHz,  $\text{CDCl}_3$ )  $\delta$  7.35–7.28 (m, 5H), 5.82 (ddt,  $J = 17.2, 10.3, 6.6$  Hz, 1H), 5.05–4.96 (m, 2H), 4.50 (s, 2H), 4.05–4.00 (m, 1H), 3.47 (t,  $J = 6.6$  Hz, 2H), 2.12–2.03 (m, 2H), 1.85–1.25 (m, 12H);  $^{13}\text{C}$  NMR (75 MHz,  $\text{CDCl}_3$ )  $\delta$  138.5, 138.2, 128.3, 127.5, 127.4, 114.9, 72.8, 70.2, 58.3, 39.0, 38.4, 33.0, 29.5, 27.3, 26.7, 25.6; FTIR (thin film,  $\text{CH}_2\text{Cl}_2$ ,  $\text{cm}^{-1}$ ) 3053, 2937, 2860, 2305, 1640, 1454, 1363, 1265, 1100, 739, 704; HRMS (ESI)  $m/z$  ( $\text{M}^+ - \text{H}$ ) calculated for  $\text{C}_{18}\text{H}_{26}^{79}\text{BrO}$  337.1167, found 337.1199.

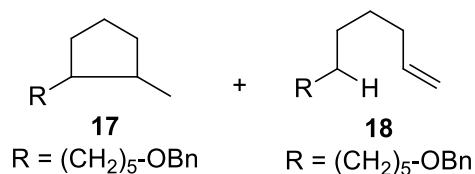

**(((5-(2-methylcyclopentyl)pentyl)oxy)methyl)benzene (17) and ((undec-10-en-1-yloxy)methyl)benzene (18):** General conditions were used to yield the title compounds of a 5:1 mixture of (((5-(2-methylcyclopentyl)pentyl)oxy)methyl)benzene (two stereoisomers) and

((undec-10-en-1-yloxy)methyl)benzene as a colorless oil:  $^1\text{H}$  NMR ( $\text{C}_6\text{D}_6$ , 400 MHz) : major isomer of (((5-(2-methylcyclopentyl)pentyl)oxy)methyl)benzene:  $\delta$  0.79 (d,  $J$  = 6.8 Hz, 3H); minor isomer:  $\delta$  0.98 (d,  $J$  = 6.8 Hz, 3H); ((undec-10-en-1-yloxy)methyl)benzene:  $\delta$  5.84–5.73 (m, 1H), 5.07–4.94 (m, 2H); overlapping signals:  $\delta$  7.34–7.32 (m, 2H), 7.21–7.17 (m, 2H), 7.12–7.08 (m, 1H), 4.37 (s, 2H), 3.35 (t,  $J$  = 6.4 Hz, 2H), 1.97–1.05 (m, 16H). These data are consistent with the previously reported characterization.<sup>11,17</sup>

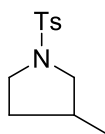

**3-Methyl-1-tosylpyrrolidine (20):** General conditions were used to yield the title compound as a white solid:  $^1\text{H}$  NMR ( $\text{CDCl}_3$ , 400 MHz)  $\delta$  7.72 (d,  $J$  = 8.4 Hz, 2H), 7.32 (d,  $J$  = 8.0 Hz, 2H), 3.45–3.41 (m, 1H), 3.38–3.32 (m, 1H), 3.26–3.19 (m, 1H), 2.76 (t,  $J$  = 8.0 Hz, 1H), 2.44 (s, 3H), 2.12 (dq,  $J$  = 9.7, 7.3 Hz, 1H), 1.95–1.86 (m, 1H), 1.35 (dq,  $J$  = 9.7, 6.5 Hz, 1H), 0.92 (d,  $J$  = 6.5 Hz, 3H). These data are consistent with the previously reported characterization.<sup>18</sup>

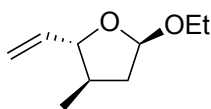

**5-Ethoxy-3-methyl-2-vinyltetrahydrofuran (22):** General conditions were used to yield the title compound (as two diastereoisomers, 9:1) as a colorless oil:  $^1\text{H}$  NMR ( $\text{CDCl}_3$ , 300 MHz) (2S,3R,5R)-5-ethoxy-3-methyl-2-vinyltetrahydrofuran:  $\delta$  5.77 (ddd,  $J$  = 7.5, 10.2, 17.4 Hz, 1H), 5.32–5.15 (m, 3H), 3.95 (t,  $J$  = 8.4 Hz, 2H), 3.80 (dq,  $J$  = 7.2, 10.2 Hz, 1H), 3.45 (dq,  $J$  = 7.2, 10.2 Hz, 1H), 2.41 (ddd,  $J$  = 5.7, 8.7, 13.8 Hz, 1H), 1.91–1.77 (m, 1H), 1.57–1.49 (m, 1H), 1.22

(t,  $J = 7.2$  Hz, 3H), 1.04 (d,  $J = 6.6$  Hz, 3H). These data are consistent with the previously reported characterization.<sup>19</sup>

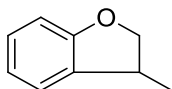

**3-Methyl-2,3-dihydrobenzofuran (24):** General conditions were used to yield the title compound as a colorless oil: <sup>1</sup>H NMR (C<sub>6</sub>D<sub>6</sub>, 400 MHz):  $\delta$  7.02–6.97 (m, 1H), 6.94–6.86 (m, 1H), 6.81–6.80 (m, 1H), 6.79–6.77 (m, 1H), 4.24 (t,  $J = 8.8$  Hz, 1H), 3.70 (t,  $J = 7.8$  Hz, 1H), 3.06–2.96 (m, 1H), 0.89 (d,  $J = 6.8$  Hz, 3H). These data are consistent with the previously reported characterization.<sup>9</sup>

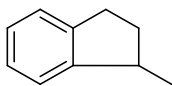

**1-Methylindane (25):** General conditions were used to yield the title compound as a colorless oil: <sup>1</sup>H NMR (CDCl<sub>3</sub>, 500 MHz):  $\delta$  7.24–7.15 (m, 4H), 3.23–3.16 (m, 1H), 2.92–2.86 (m, 2H), 2.35–2.28 (m, 1H), 1.65–1.57 (m, 1H), 1.29 (d,  $J = 7.0$  Hz, 3H). These data are consistent with the previously reported characterization.<sup>20</sup>

## Additional Preparative Experiments:

**Table S1.** Reduction of Ad-I **4a** with diMe-Imd-BH<sub>3</sub> **1** with other additives and initiators.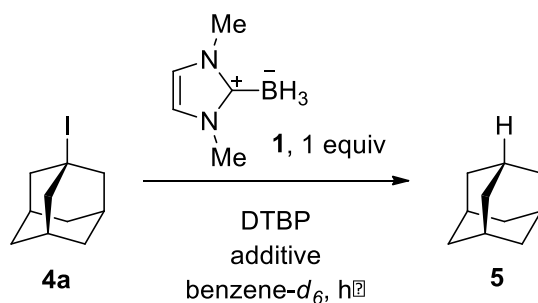

| Entry          | additive (5 mol%)               | time | conversion of <b>4a</b> | yield of <b>5</b> <sup>a</sup> |
|----------------|---------------------------------|------|-------------------------|--------------------------------|
| 1 <sup>b</sup> | PhSH                            | 1 h  | 99%                     | 99%                            |
| 2              | PhSeH                           | 2 h  | 32%                     | -                              |
| 3              | 2,4,6-trimethylphenol <b>S1</b> | 1 h  | 20%                     | -                              |
| 4              | TBC <sup>c</sup> <b>S2</b>      | 3 h  | 47%                     | -                              |
| 5 <sup>d</sup> | PhSH                            | 3 h  | 88%                     | 84%                            |

<sup>a</sup>) NMR yield determined with 1,3,5-trimethoxybenzene as the internal standard; <sup>b</sup>) data are from entry 8 in

Table 1; <sup>c</sup>) 4-*tert*-butylcatechol; <sup>d</sup>) initiator source: black light (15W and peak wavelength at 357 nm).

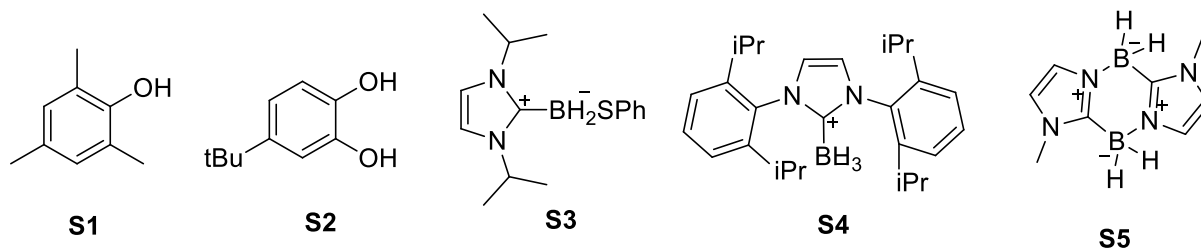**Figure S2.** Structure used in Table S1 and S2.

**Table S2.** Reduction of Ad-I **4a** with other borane sources with 5% PhSH.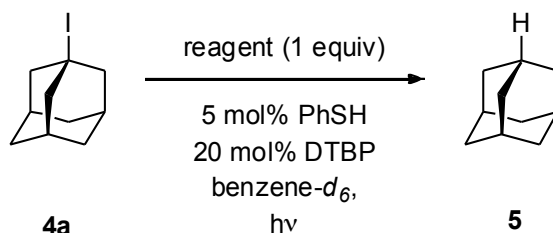

| Entry           | reagent                                          | time | conversion of <b>4a</b> | yield of <b>5</b> <sup>a</sup> |
|-----------------|--------------------------------------------------|------|-------------------------|--------------------------------|
| 1 <sup>b</sup>  | diMe-Imd-BH <sub>3</sub> <b>1</b>                | 1 h  | 99%                     | 99%                            |
| 2               | diMe-Imd-BH <sub>3</sub> <b>1</b> <sup>c</sup>   | 1 h  | 50%                     | 50%                            |
| 3               | dipp-Imd-BH <sub>3</sub> <b>S4</b>               | 1 h  | 99%                     | 86%                            |
| 4 <sup>d</sup>  | diMe-Tri-BH <sub>3</sub> <b>2</b>                | 1 h  | 99%                     | 77% <sup>e</sup>               |
| 5               | Dimer <b>S5</b>                                  | 1 h  | 0%                      | -                              |
| 6               | Me <sub>3</sub> N-BH <sub>3</sub>                | 12 h | 17%                     | -                              |
| 7               | pyridine-BH <sub>3</sub> <sup>f</sup>            | 12 h | 89%                     | 75%                            |
| 8 <sup>d</sup>  | pyridine-BH <sub>3</sub> <sup>f</sup>            | 12 h | 64%                     | 64%                            |
| 9               | Ph <sub>3</sub> P-BH <sub>3</sub>                | 4 h  | 0%                      | -                              |
| 10 <sup>d</sup> | Bu <sub>4</sub> NBH <sub>3</sub> CN <sup>f</sup> | 2 h  | 99%                     | ~20%                           |
| 11              | Bu <sub>4</sub> NBH <sub>3</sub> CN <sup>g</sup> | 3 h  | 99%                     | 93%                            |

<sup>a</sup>) NMR yield determined with 1,3,5-trimethoxybenzene as the internal standard; <sup>b</sup>) data are from entry 8 in

Table 1; <sup>c</sup>) 0.5 equiv used; <sup>d</sup>) 20 mol% TBHN under thermal conditions; <sup>e</sup>) isolated yield after aqueous extraction; <sup>f</sup>) 2 equiv; <sup>g</sup>) 5 equiv.

**Table S3.** Additional reductions with Bu<sub>4</sub>NBH<sub>3</sub>CN and pyridine-BH<sub>3</sub>.

|       |            | $\begin{array}{c} \text{R-X} \\ \text{X= I or Br} \end{array} \xrightarrow[\substack{\text{initiator} \\ (\text{hv for DTBP or heat for TBHN}) \\ 5 \text{ mol\%PhSH} \\ \text{benzene}}]{\text{reagent}} \text{R-H}$ |                     |      |            |                    |
|-------|------------|-----------------------------------------------------------------------------------------------------------------------------------------------------------------------------------------------------------------------|---------------------|------|------------|--------------------|
| Entry | R-X        | reagent                                                                                                                                                                                                               | initiator (20 mol%) | time | conversion | yield <sup>a</sup> |
| 1     | <b>4b</b>  | Bu <sub>4</sub> NBH <sub>3</sub> CN <sup>b</sup>                                                                                                                                                                      | DTBP                | 2 h  | ~20%       | -                  |
| 2     | <b>4b</b>  | Bu <sub>4</sub> NBH <sub>3</sub> CN <sup>c</sup>                                                                                                                                                                      | TBHN                | 2 h  | 17%        | -                  |
| 3     | <b>14a</b> | Bu <sub>4</sub> NBH <sub>3</sub> CN <sup>b</sup>                                                                                                                                                                      | DTBP                | 7 h  | 99%        | 56%                |
| 4     | <b>14a</b> | Bu <sub>4</sub> NBH <sub>3</sub> CN <sup>c</sup>                                                                                                                                                                      | TBHN                | 2 h  | 99%        | ~25%               |
| 5     | <b>4b</b>  | pyridine-BH <sub>3</sub> <sup>d</sup>                                                                                                                                                                                 | DTBP                | 8 h  | 0%         | -                  |
| 6     | <b>14a</b> | pyridine-BH <sub>3</sub> <sup>d</sup>                                                                                                                                                                                 | DTBP                | 8 h  | 72%        | 72%                |
| 7     | <b>14b</b> | pyridine-BH <sub>3</sub> <sup>d</sup>                                                                                                                                                                                 | DTBP                | 8 h  | 0%         | -                  |

a) NMR yield determined with 1,3,5-trimethoxybenzene as the internal standard; <sup>b)</sup> 5 equiv; <sup>c)</sup> 2 equiv; <sup>d)</sup> 3 equiv.

**Table S4.** Reduction of aryl iodide **14a** with diMe-Imd-BH<sub>3</sub> **1** with and without thiol sources.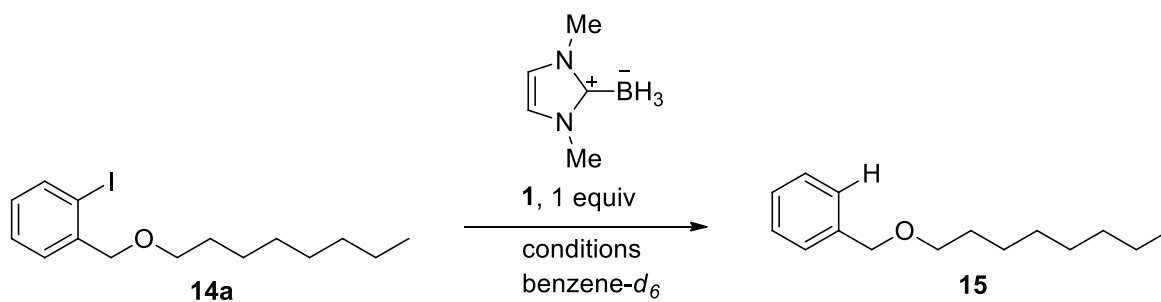

| Entry          | initiator         | equiv | PhSH   | time | conversion of <b>14a</b> | yield of <b>15</b> <sup>a</sup> |
|----------------|-------------------|-------|--------|------|--------------------------|---------------------------------|
| 1              | Et <sub>3</sub> B | 0.5   | none   | 7 h  | 0%                       | 0%                              |
| 2              | Et <sub>3</sub> B | 0.5   | 5 mol% | 3 h  | 61%                      | 61%                             |
| 3              | TBHN              | 0.2   | none   | 3 h  | 62%                      | 28%                             |
| 4 <sup>b</sup> | TBHN              | 0.2   | 5 mol% | 3 h  | 99%                      | 86%                             |
| 5              | DTBP              | 0.2   | none   | 7 h  | 87%                      | 39%                             |
| 6 <sup>b</sup> | DTBP              | 0.2   | 5 mol% | 7 h  | 92%                      | 86%                             |
| 7              | AIBN              | 0.2   | none   | 2 h  | 58%                      | 15%                             |
| 8              | AIBN              | 0.2   | 5 mol% | 2 h  | 61%                      | 24%                             |

<sup>a</sup>) NMR yield determined with 1,3,5-trimethoxybenzene as the internal standard; <sup>b</sup>) data are from Table 2.



**Table S5.** Additional control experiments.

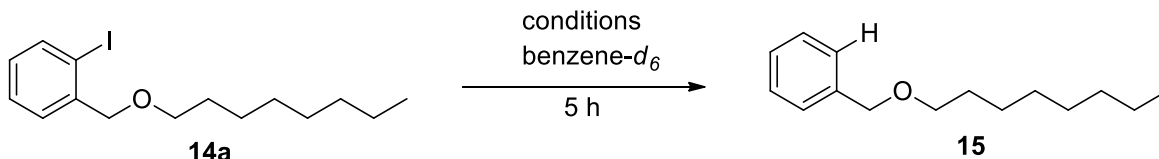

CCCCCCCCOc1ccccc1I (14a)  $\xrightarrow[5\text{ h}]{\text{conditions, benzene-}d_6}$  CCCCCCCCOc1ccccc1O (15)

| Entry | conditions                                                  | conversion of <b>14a</b> | yield of <b>15</b> <sup>a</sup> |
|-------|-------------------------------------------------------------|--------------------------|---------------------------------|
| 1     | Et <sub>3</sub> B (0.5 equiv), 5% PhSH, rt                  | 0%                       | 0%                              |
| 2     | TBHN (0.1 equiv), 5% PhSH, 80 °C                            | 19%                      | 0%                              |
| 3     | DTBP (0.1 equiv), 5% PhSH, hν                               | 4%                       | 4%                              |
| 4     | diMe-Imd-BH <sub>3</sub> <b>1</b> (1 equiv), 5% PhSH, 80 °C | 19%                      | 9%                              |

<sup>a</sup>) NMR yield determined with 1,3,5-trimethoxybenzene as the internal standard.

**Table S6.** TBHN- or DTBP-initiated reduction of **14a** with different thiol sources.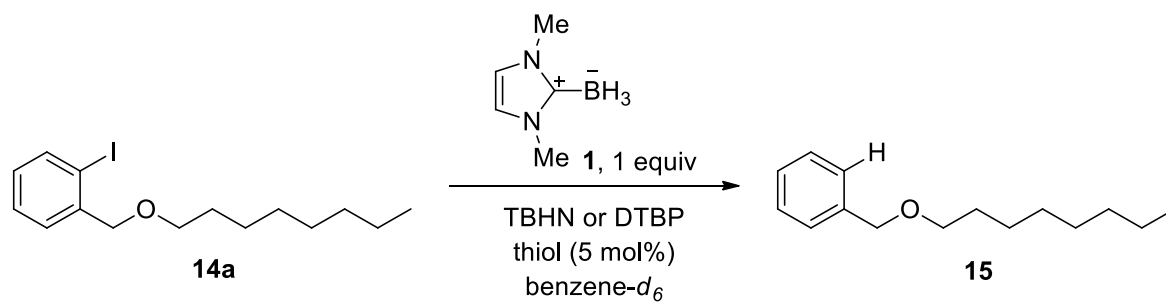

| Entry | initiator (0.2 equiv) | thiol (5 mol%)             | time | conversion of <b>14a</b> | yield of <b>15</b> <sup>a</sup> |
|-------|-----------------------|----------------------------|------|--------------------------|---------------------------------|
| 1     | TBHN                  | thiophenol                 | 3 h  | 99%                      | 92%                             |
| 2     | TBHN                  | 1-pentadecanethiol         | 3 h  | 72%                      | 60%                             |
| 3     | TBHN                  | <i>tert</i> -dodecanethiol | 3 h  | 99%                      | 96%                             |
| 4     | DTBP                  | thiophenol                 | 6 h  | 81%                      | 76%                             |
| 5     | DTBP                  | 1-pentadecanethiol         | 6 h  | 88%                      | 64%                             |
| 6     | DTBP                  | <i>tert</i> -dodecanethiol | 6 h  | 95%                      | 89%                             |

<sup>a</sup>) NMR yield determined with 1,3,5-trimethoxybenzene as the internal standard.

**Table S7.** TBHN-initiated reduction of **14a** with different amounts of *t*-dodecanethiol.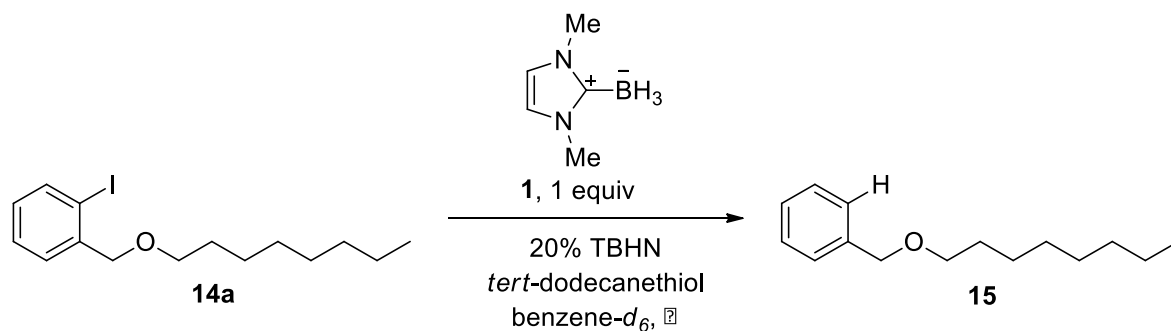

| Entry | <i>tert</i> -dodecanethiol (mol%) | conversion of <b>14a</b> | yield of <b>15</b> <sup>a</sup> |
|-------|-----------------------------------|--------------------------|---------------------------------|
| 1     | 0.5%                              | 58%                      | 44%                             |
| 2     | 1%                                | 66%                      | 53%                             |
| 3     | 2%                                | 83%                      | 70%                             |
| 4     | 5%                                | 99%                      | 87%                             |
| 5     | 10%                               | 99%                      | 86%                             |
| 6     | 20%                               | 99%                      | 82%                             |

<sup>a</sup>) NMR yield determined with 1,3,5-trimethoxybenzene as the internal standard.

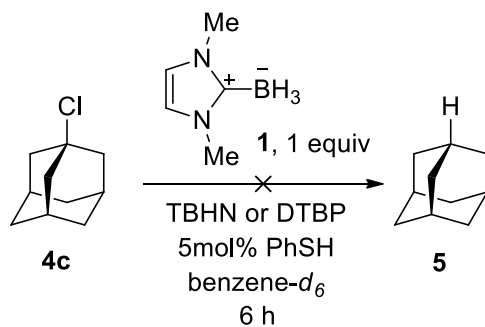

**Reductions of adamantyl chloride under TBHN or DTBP conditions:** The TBHN- or DTBP-initiated reactions between 1-chloroadamantane **4c** (Ad-Cl) and **1** (1 equiv) with 5mol% PhSH gave only 5% conversion of **5** after 6 h.

## Mechanistic Studies

**Laser Flash Photolysis Experiments:** Nanosecond laser flash photolysis (LFP) experiments were carried out using a Q-switched nanosecond Nd/YAG laser ( $\lambda_{\text{exc}} = 355$  nm, 9 ns pulses; energy reduced down to 10 mJ) from Continuum (Powerlite 9010) and an analyzing system consisting of a pulsed xenon lamp, a monochromator, a fast photomultiplier and a transient digitizer.<sup>21</sup>

**ESR spin trapping experiments:** ESR spin trapping experiments were carried out using a X-Band spectrometer (MS 200 Magnetech) as presented in reference.<sup>22</sup> The radicals generated under the light irradiation (Xe-Hg lamp (Hamamatsu, L8252, 150 W;  $\lambda > 310$  nm) were trapped by phenyl-N-tbutylnitron (PBN). The ESR spectra simulations were carried out with the PEST WINSIM program.<sup>23</sup>

## Calculations

### OPTIMIZED STRUCTURES: UB3LYP/6-31+G\* LEVEL (GAUSSIAN 03)<sup>1</sup>

[1] Gaussian 03, Revision B-2, M. J. Frisch, G. W. Trucks, H. B. Schlegel, G. E. Scuseria, M. A. Robb, J. R. Cheeseman, V. G. Zakrzewski, J. A. Montgomery, Jr., R. E. Stratmann, J. C. Burant, S. Dapprich, J. M. Millam, A. D. Daniels, K. N. Kudin, M. C. Strain, O. Farkas, J. Tomasi, V. Barone, M. Cossi, R. Cammi, B. Mennucci, C. Pomelli, C. Adamo, S. Clifford, J. Ochterski, G. A. Petersson, P. Y. Ayala, Q. Cui, K. Morokuma, P. Salvador, J. J. Dannenberg, D. K. Malick, A. D. Rabuck, K. Raghavachari, J. B. Foresman, J. Cioslowski, J. V. Ortiz, A. G. Baboul, B. B. Stefanov, G. Liu, A. Liashenko, P. Piskorz, I. Komaromi, R. Gomperts, R. L. Martin, D. J. Fox, T. Keith, M. A. Al-Laham, C. Y. Peng, A. Nanayakkara, M. Challacombe, P. M. W. Gill, B. Johnson, W. Chen, M. W. Wong, J. L. Andres, C. Gonzalez, M. Head-Gordon, E. S. Replogle, and J. A. Pople, Gaussian, Inc., Pittsburgh PA, 2003. b) J.B. Foresman, A. Frisch, in *Exploring Chemistry with Electronic Structure Methods*. Second Edition, Gaussian. Inc. 1996.

|             |
|-------------|
| <b>PhS•</b> |
|-------------|

C

C,1,B1

C,1,B2,2,A1

H,1,B3,3,A2,2,D1,0

C,2,B4,1,A3,3,D2,0

C,3,B5,1,A4,2,D3,0

H,2,B6,1,A5,3,D4,0

H,3,B7,1,A6,2,D5,0

C,5,B8,2,A7,1,D6,0

S,6,B9,3,A8,1,D7,0

H,5,B10,2,A9,1,D8,0

H,9,B11,5,A10,2,D9,0

Variables:

B1=1.40297994

B2=1.39004553

B3=1.08692281

B4=1.40297855

B5=1.42209218

B6=1.08697134

B7=1.08591483

B8=1.39004153

B9=1.72846045

B10=1.08692399

B11=1.08591399

A1=120.10099111  
 A2=119.95249864  
 A3=120.19165273  
 A4=120.6470863  
 A5=119.90378352  
 A6=120.82189445  
 A7=120.101211  
 A8=120.84413711  
 A9=119.94637921  
 A10=120.82289626  
 D1=180.  
 D2=0.  
 D3=0.  
 D4=180.  
 D5=180.  
 D6=0.  
 D7=180.  
 D8=180.  
 D9=180.

|                        |
|------------------------|
| <b>PhS<sup>+</sup></b> |
|------------------------|

C

C,1,B1  
 C,1,B2,2,A1  
 H,1,B3,3,A2,2,D1,0  
 C,2,B4,1,A3,3,D2,0  
 C,3,B5,1,A4,2,D3,0  
 H,2,B6,1,A5,3,D4,0  
 H,3,B7,1,A6,2,D5,0  
 C,5,B8,2,A7,1,D6,0  
 S,6,B9,3,A8,1,D7,0  
 H,5,B10,2,A9,1,D8,0  
 H,9,B11,5,A10,2,D9,0

Variables:

B1=1.41756597  
 B2=1.37320532  
 B3=1.08551158  
 B4=1.41756519  
 B5=1.46058167  
 B6=1.08788184  
 B7=1.08599895  
 B8=1.3732066  
 B9=1.65345567  
 B10=1.08551171  
 B11=1.08599912  
 A1=119.31379578

A2=120.9361277  
 A3=122.56530509  
 A4=119.97862258  
 A5=118.71727227  
 A6=121.90823327  
 A7=119.31402086  
 A8=120.57467668  
 A9=119.75009691  
 A10=121.90771698  
 D1=180.  
 D2=0.  
 D3=0.  
 D4=180.  
 D5=180.  
 D6=0.  
 D7=180.  
 D8=180.  
 D9=180.

|                  |
|------------------|
| PhS <sup>-</sup> |
|------------------|

C

C,1,B1  
 C,1,B2,2,A1  
 H,1,B3,3,A2,2,D1,0  
 C,2,B4,1,A3,3,D2,0  
 C,3,B5,1,A4,2,D3,0  
 H,2,B6,1,A5,3,D4,0  
 H,3,B7,1,A6,2,D5,0  
 C,5,B8,2,A7,1,D6,0  
 S,6,B9,3,A8,1,D7,0  
 H,5,B10,2,A9,1,D8,0  
 H,9,B11,5,A10,2,D9,0

Variables:

B1=1.40349921  
 B2=1.39488609  
 B3=1.09121816  
 B4=1.40349855  
 B5=1.42443711  
 B6=1.08880879  
 B7=1.08806346  
 B8=1.39488539  
 B9=1.74961564  
 B10=1.0912185  
 B11=1.08806323  
 A1=121.0683644

A2=119.19446527  
 A3=117.9295248  
 A4=122.31407164  
 A5=121.03510598  
 A6=119.87933716  
 A7=121.06839518  
 A8=122.34725695  
 A9=119.73715612  
 A10=119.87955485  
 D1=180.  
 D2=0.  
 D3=0.  
 D4=180.  
 D5=180.  
 D6=0.  
 D7=180.  
 D8=180.  
 D9=180.

|    |
|----|
| 1• |
|----|

C

C,1,B1  
 N,1,B2,2,A1  
 H,1,B3,2,A2,3,D1,0  
 C,3,B4,1,A3,2,D2,0  
 N,2,B5,1,A4,3,D3,0  
 C,3,B6,1,A5,2,D4,0  
 H,2,B7,1,A6,3,D5,0  
 C,6,B8,2,A7,1,D6,0  
 H,7,B9,3,A8,1,D7,0  
 H,7,B10,3,A9,1,D8,0  
 H,7,B11,3,A10,1,D9,0  
 B,5,B12,3,A11,1,D10,0  
 H,9,B13,6,A12,2,D11,0  
 H,9,B14,6,A13,2,D12,0  
 H,9,B15,6,A14,2,D13,0  
 H,13,B16,5,A15,3,D14,0  
 H,13,B17,5,A16,3,D15,0

Variables:

B1=1.36176568  
 B2=1.38159399  
 B3=1.07954644  
 B4=1.39315928  
 B5=1.38159395  
 B6=1.44988682  
 B7=1.07954629



B8=1.44988699  
 B9=1.09535825  
 B10=1.09534672  
 B11=1.09250694  
 B12=1.50333447  
 B13=1.09535823  
 B14=1.09250695  
 B15=1.09534679  
 B16=1.19760658  
 B17=1.19760674  
 A1=107.53367667  
 A2=130.33475946  
 A3=110.51379581  
 A4=107.53384645  
 A5=125.68212017  
 A6=130.33468208  
 A7=125.6821282  
 A8=110.41200753  
 A9=110.40765825  
 A10=108.84383589  
 A11=128.04750591  
 A12=110.41216334  
 A13=108.84383573  
 A14=110.40761014  
 A15=119.64049004  
 A16=119.64053978  
 D1=179.99853406  
 D2=-0.00167638  
 D3=0.00258347  
 D4=179.99942187  
 D5=-179.99912284  
 D6=179.99764861  
 D7=120.02112008  
 D8=-120.12077374  
 D9=-0.05106882  
 D10=-179.99497671  
 D11=-120.02288514  
 D12=0.04929655  
 D13=120.11886014  
 D14=-0.00574566  
 D15=179.99958339

|       |
|-------|
| $1^+$ |
|-------|

C

C,1,R2

N,1,R3,2,A3

H,1,R4,2,A4,3,D4,0  
C,3,R5,1,A5,2,D5,0  
N,2,R6,1,A6,3,D6,0  
C,3,R7,1,A7,5,D7,0  
H,2,R8,1,A8,6,D8,0  
C,6,R9,2,A9,1,D9,0  
B,5,R10,3,A10,1,D10,0  
H,7,R11,3,A11,1,D11,0  
H,7,R12,3,A12,11,D12,0  
H,7,R13,3,A13,11,D13,0  
H,9,R14,6,A14,2,D14,0  
H,9,R15,6,A15,14,D15,0  
H,9,R16,6,A16,14,D16,0  
H,10,R17,5,A17,3,D17,0  
H,10,R18,5,A18,17,D18,0

Variables:

R2=1.37904686  
R3=1.36012347  
R4=1.08010404  
R5=1.36797111  
R6=1.36012418  
R7=1.47529048  
R8=1.08010383  
R9=1.47528158  
R10=1.54093325  
R11=1.08986181  
R12=1.0908224  
R13=1.09106828  
R14=1.09105646  
R15=1.08986272  
R16=1.09083548  
R17=1.18603863  
R18=1.18603894  
A3=107.14189869  
A4=130.1720748  
A5=110.00422498  
A6=107.14196998  
A7=124.45254267  
A8=130.17225099  
A9=124.45368597  
A10=127.14601117  
A11=108.07403542  
A12=109.76792672  
A13=109.77085267  
A14=109.77207549  
A15=108.07439795

A16=109.76775323  
 A17=119.11720457  
 A18=119.11742032  
 D4=179.99482045  
 D5=0.02289027  
 D6=-0.02442573  
 D7=179.7968616  
 D8=179.97687415  
 D9=179.84866165  
 D10=179.98460248  
 D11=1.49885394  
 D12=119.42766114  
 D13=-119.45883546  
 D14=-118.0852215  
 D15=119.45828143  
 D16=-121.11449343  
 D17=0.14722236  
 D18=-179.99814467

|                |
|----------------|
| 1 <sup>-</sup> |
|----------------|

C

C,1,R2  
 N,1,R3,2,A3  
 H,1,R4,2,A4,3,D4,0  
 C,3,R5,1,A5,2,D5,0  
 N,2,R6,1,A6,3,D6,0  
 C,3,R7,1,A7,5,D7,0  
 H,2,R8,1,A8,6,D8,0  
 C,6,R9,2,A9,1,D9,0  
 B,5,R10,3,A10,1,D10,0  
 H,7,R11,3,A11,1,D11,0  
 H,7,R12,3,A12,11,D12,0  
 H,7,R13,3,A13,11,D13,0  
 H,9,R14,6,A14,2,D14,0  
 H,9,R15,6,A15,14,D15,0  
 H,9,R16,6,A16,14,D16,0  
 H,10,R17,5,A17,3,D17,0  
 H,10,R18,5,A18,17,D18,0

Variables:

R2=1.35471747  
 R3=1.39761721  
 R4=1.08302246  
 R5=1.45075524  
 R6=1.39736576  
 R7=1.44040659

R8=1.08304963  
R9=1.44020033  
R10=1.46762799  
R11=1.09796597  
R12=1.09491765  
R13=1.10974092  
R14=1.09499363  
R15=1.0979538  
R16=1.10977305  
R17=1.21157542  
R18=1.21156424  
A3=108.96645199  
A4=129.27180849  
A5=108.19429488  
A6=108.96998953  
A7=120.73293724  
A8=129.26630296  
A9=120.78731533  
A10=128.71634482  
A11=109.43928349  
A12=109.79251193  
A13=111.44038749  
A14=109.801772  
A15=109.44547436  
A16=111.43872945  
A17=120.743664  
A18=120.73130728  
D4=-171.50406284  
D5=11.12332434  
D6=0.00061003  
D7=141.68479409  
D8=171.49796157  
D9=-152.96139198  
D10=160.23628311  
D11=39.50018969  
D12=119.70963849  
D13=-121.38287339  
D14=-158.99180176  
D15=119.72230113  
D16=-118.8896345  
D17=3.75708321  
D18=175.99367061

**References:**

1. Hermanek, S. *Chem. Rev.* **1992**, 92, 325-362.
2. Walton, J. C.; Brahmi, M. M.; Fensterbank, L.; Lacôte, E.; Malacria, M.; Chu, Q.; Ueng, S.-H.; Solovyeu, A.; Curran, D. P. *J. Am. Chem. Soc.* **2010**, 132, 2350-2358.
3. Kunz, H.; Schmidt, P. *Annalen der Chemie* **1982**, 1245-1260.
4. Sun, Q.; Cai, S.; Peterson, B. R. *Org. Lett.* **2009**, 11, 567-570.
5. Medeiros, M. R.; Schacherer, L. N.; Spiegel, D. A.; Wood, J. L. *Org. Lett.* **2007**, 9, 4427-4429.
6. Linskeseder, M.; Zbiral, E. *Annalen der Chemie* **1978**, 1076-1088.
7. Chu, Q.; Makhlouf Brahmi, M.; Solovyeu, A.; Ueng, S.-H.; Curran, D. P.; Malacria, M.; Fensterbank, L.; Lacôte, E. *Chem. Eur. J.* **2009**, 15, 12937-12940.
8. Ohmiya, H.; Wakabayashi, K.; Yorimitsu, H.; Oshima, K. *Tetrahedron* **2006**, 62, 2207-2213.
9. Kurono, N.; Honda, E.; Komatsu, F.; Orito, K.; Tokuda, M. *Tetrahedron* **2004**, 60, 1791-1801.
10. Trivedi, R.; Tunge, J. A. *Org. Lett.* **2009**, 11, 5650-5652.
11. Ueng, S. H.; Fensterbank, L.; Lacôte, E.; Malacria, M.; Curran, D. P. *Org. Lett.* **2010**, 12 (13), 3002-3005.
12. Ueng, S.-H.; Makhlouf Brahmi, M.; Derat, E. t.; Fensterbank, L.; Lacôte, E.; Malacria, M.; Curran, D. P. *J. Am. Chem. Soc.* **2008**, 130, 10082-10083.
13. Yasuda, H.; Uenoyama, Y.; Nobuta, O.; Kobayashi, S.; Ryu, I. *Tetrahedron Lett.* **2008**, 49, 367-370.
14. Yates, P.; Stiver, S. *Can. J. Chem.* **1987**, 65, 2203-2216.

15. Shimojo, M.; Matsumoto, K.; Hatanaka, M. *Tetrahedron* **2000**, *56*, 9281-9288.
16. Narayan, R. S.; Borhan, B. *J. Org. Chem.* **2006**, *71*, 1416-1429.
17. Cryle, M. J.; Matovic, N. J.; De Voss, J. J. *Org. Lett.* **2003**, *5*, 3341-3344.
18. Tang, J.; Shinokubo, H.; Oshima, K. *Tetrahedron* **1999**, *55*, 1893-1904.
19. Villar, F.; Equey, O.; Renaud, P. *Org. Lett.* **2000**, *2*, 1061-1064.
20. Bailey, W. F.; Mealy, M. J. *J. Am. Chem. Soc.* **2000**, *122*, 6787-6788.
21. Lalevée, J.; Allonas, X.; Fouassier, J. P. *J. Am. Chem. Soc.* **2002**, *124*, 9613-9621.
22. Criqui, A.; Lalevée, J.; Allonas, X.; Fouassier, J. P. *Macromol. Chem. Phys.* **2008**, *2009*, 2223-2231.
23. Duling, D. R. *J. Magn. Reson., Ser. B* **1994**, *104*, 105-112.

## Typical Results for Reactions Followed by NMR Spectroscopy

<sup>1</sup>H spectra for the DTBP-initiated reduction of Ad-I: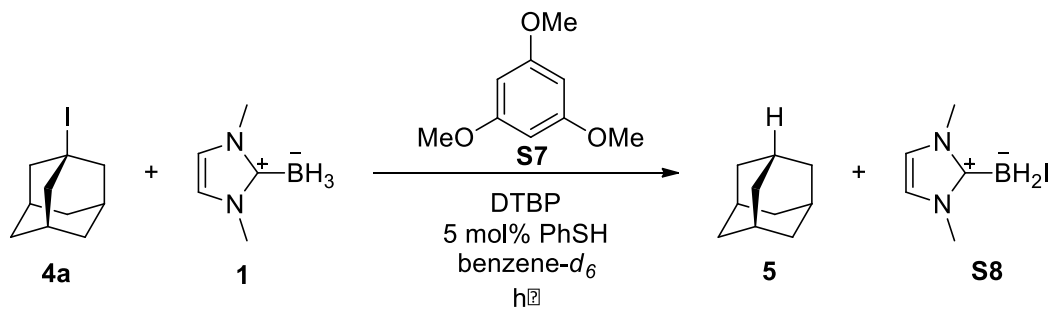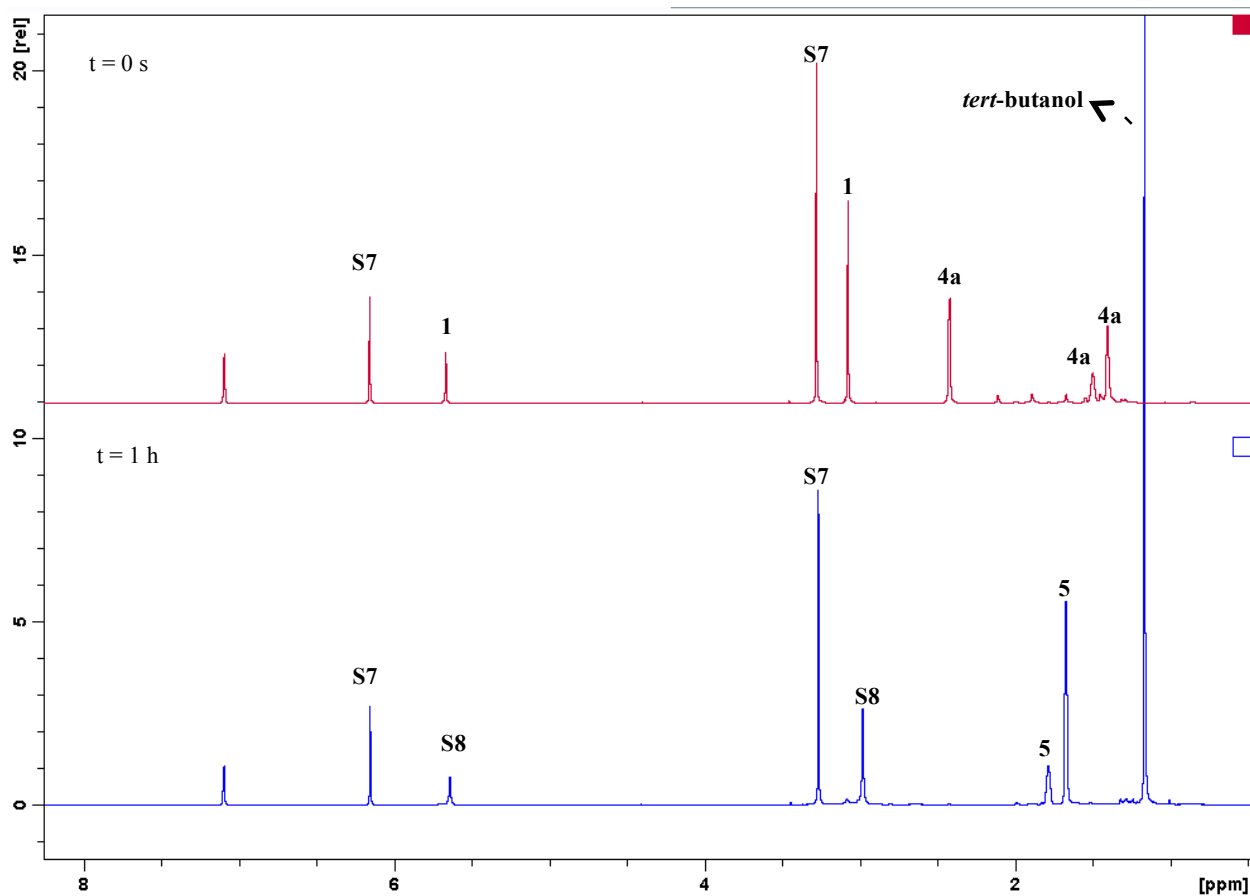

**$^{11}\text{B}$  NMR spectra for the DTBP-initiated reduction of Ad-I:**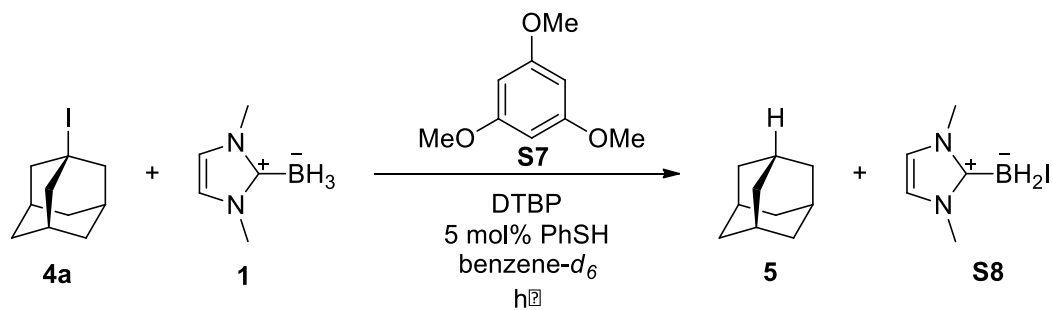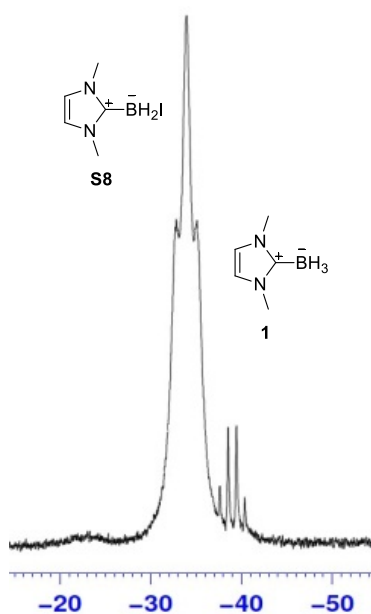



**$^1\text{H}$  spectra for the DTBP-initiated reduction of Ad-Br:**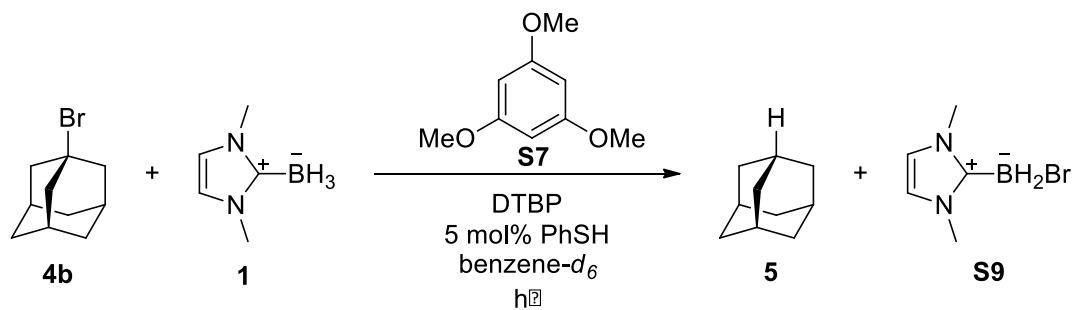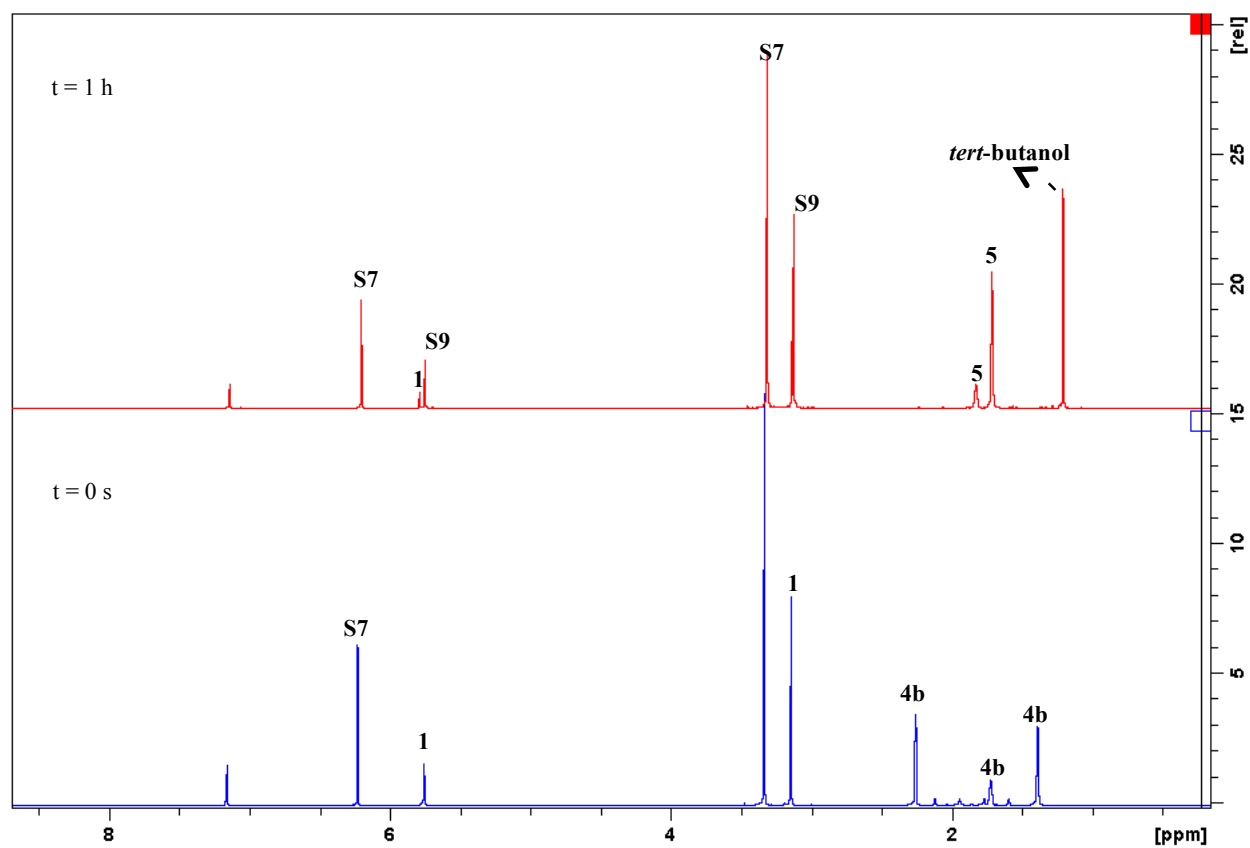

XP-72-92, part I, wash, 1H, CDCl<sub>3</sub>, 301B, 4/18/2011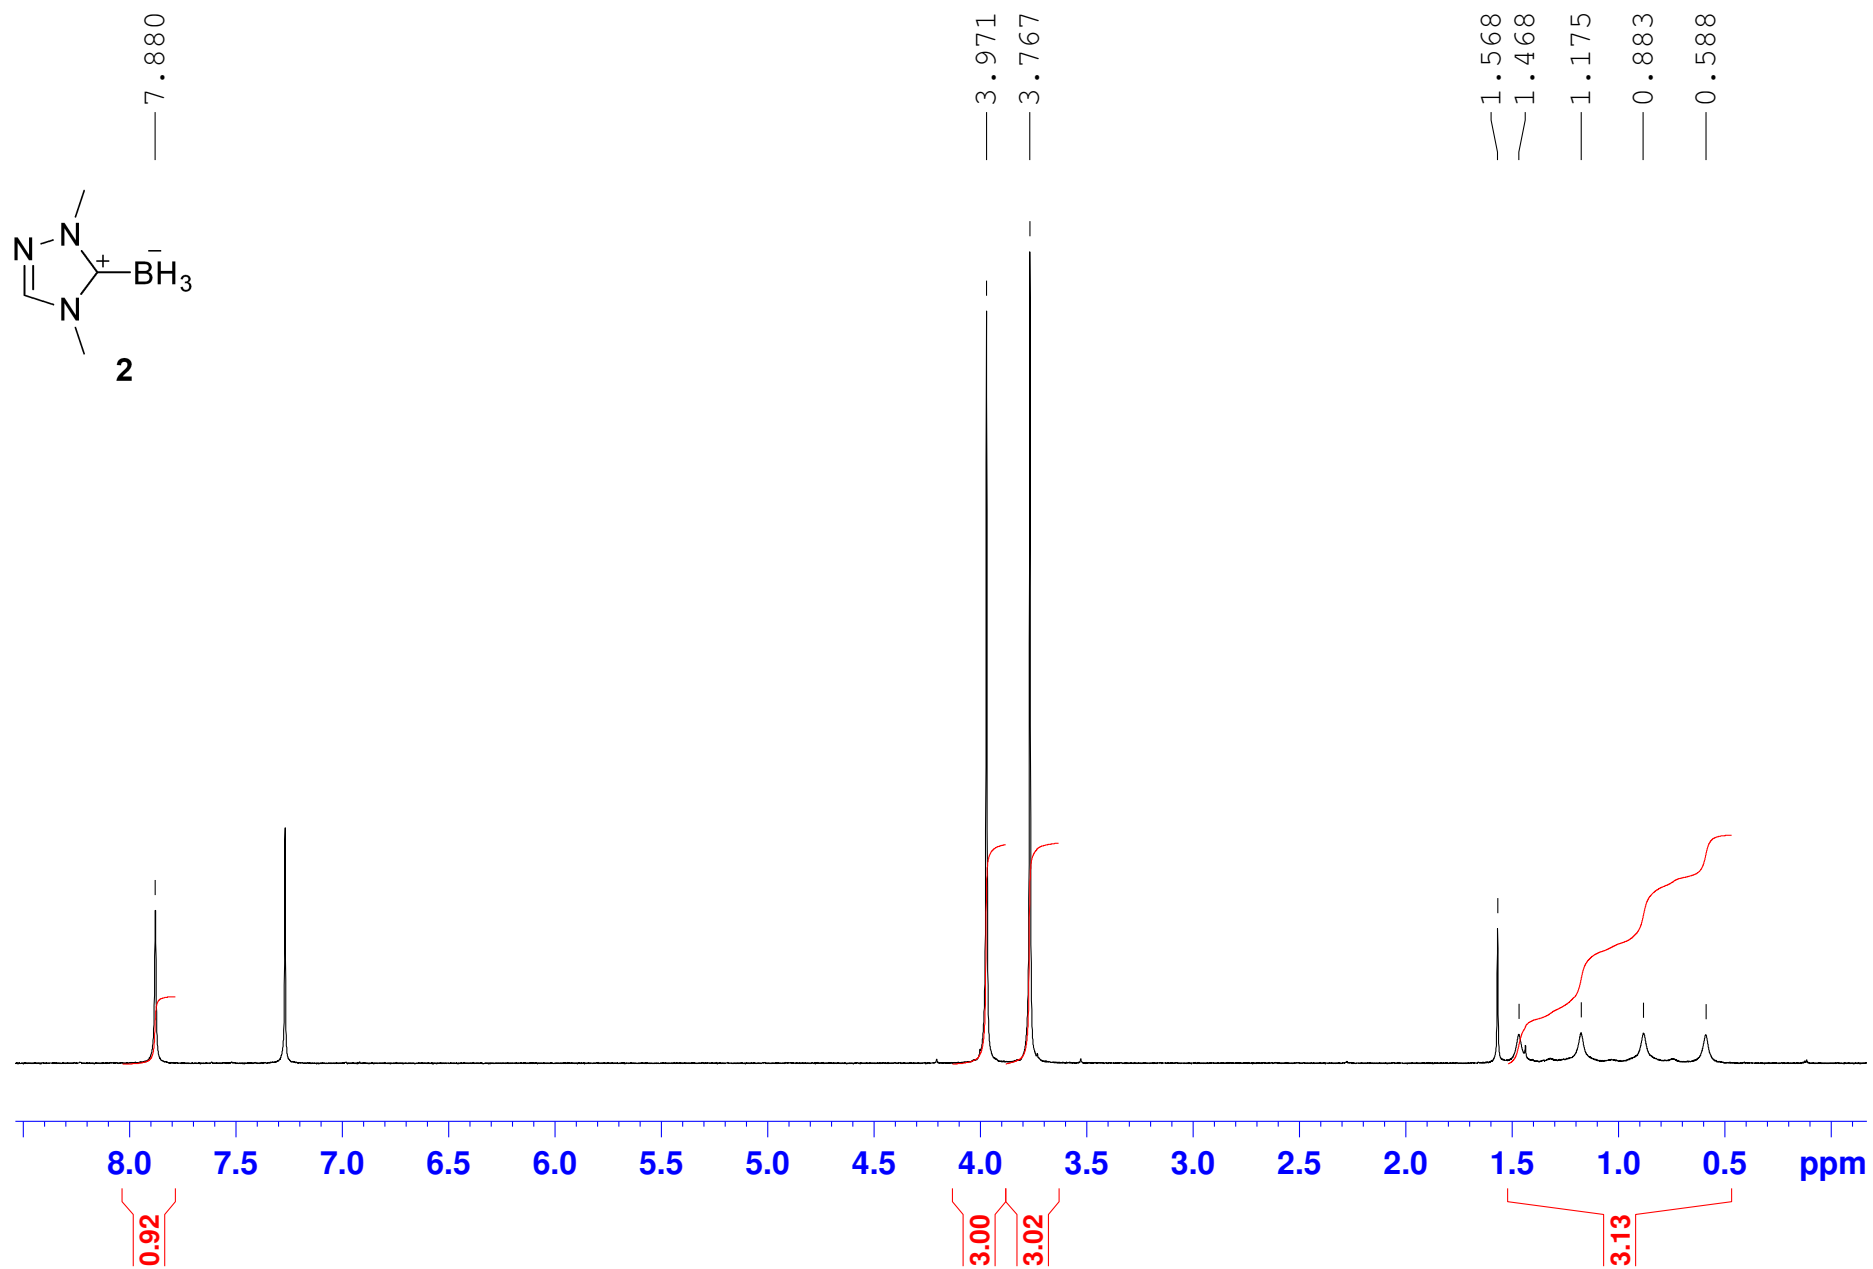

XP-72-92, part I, wash, 11B, CDCl<sub>3</sub>, 301B, 4/18/2011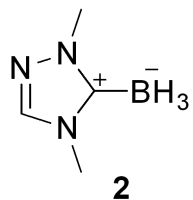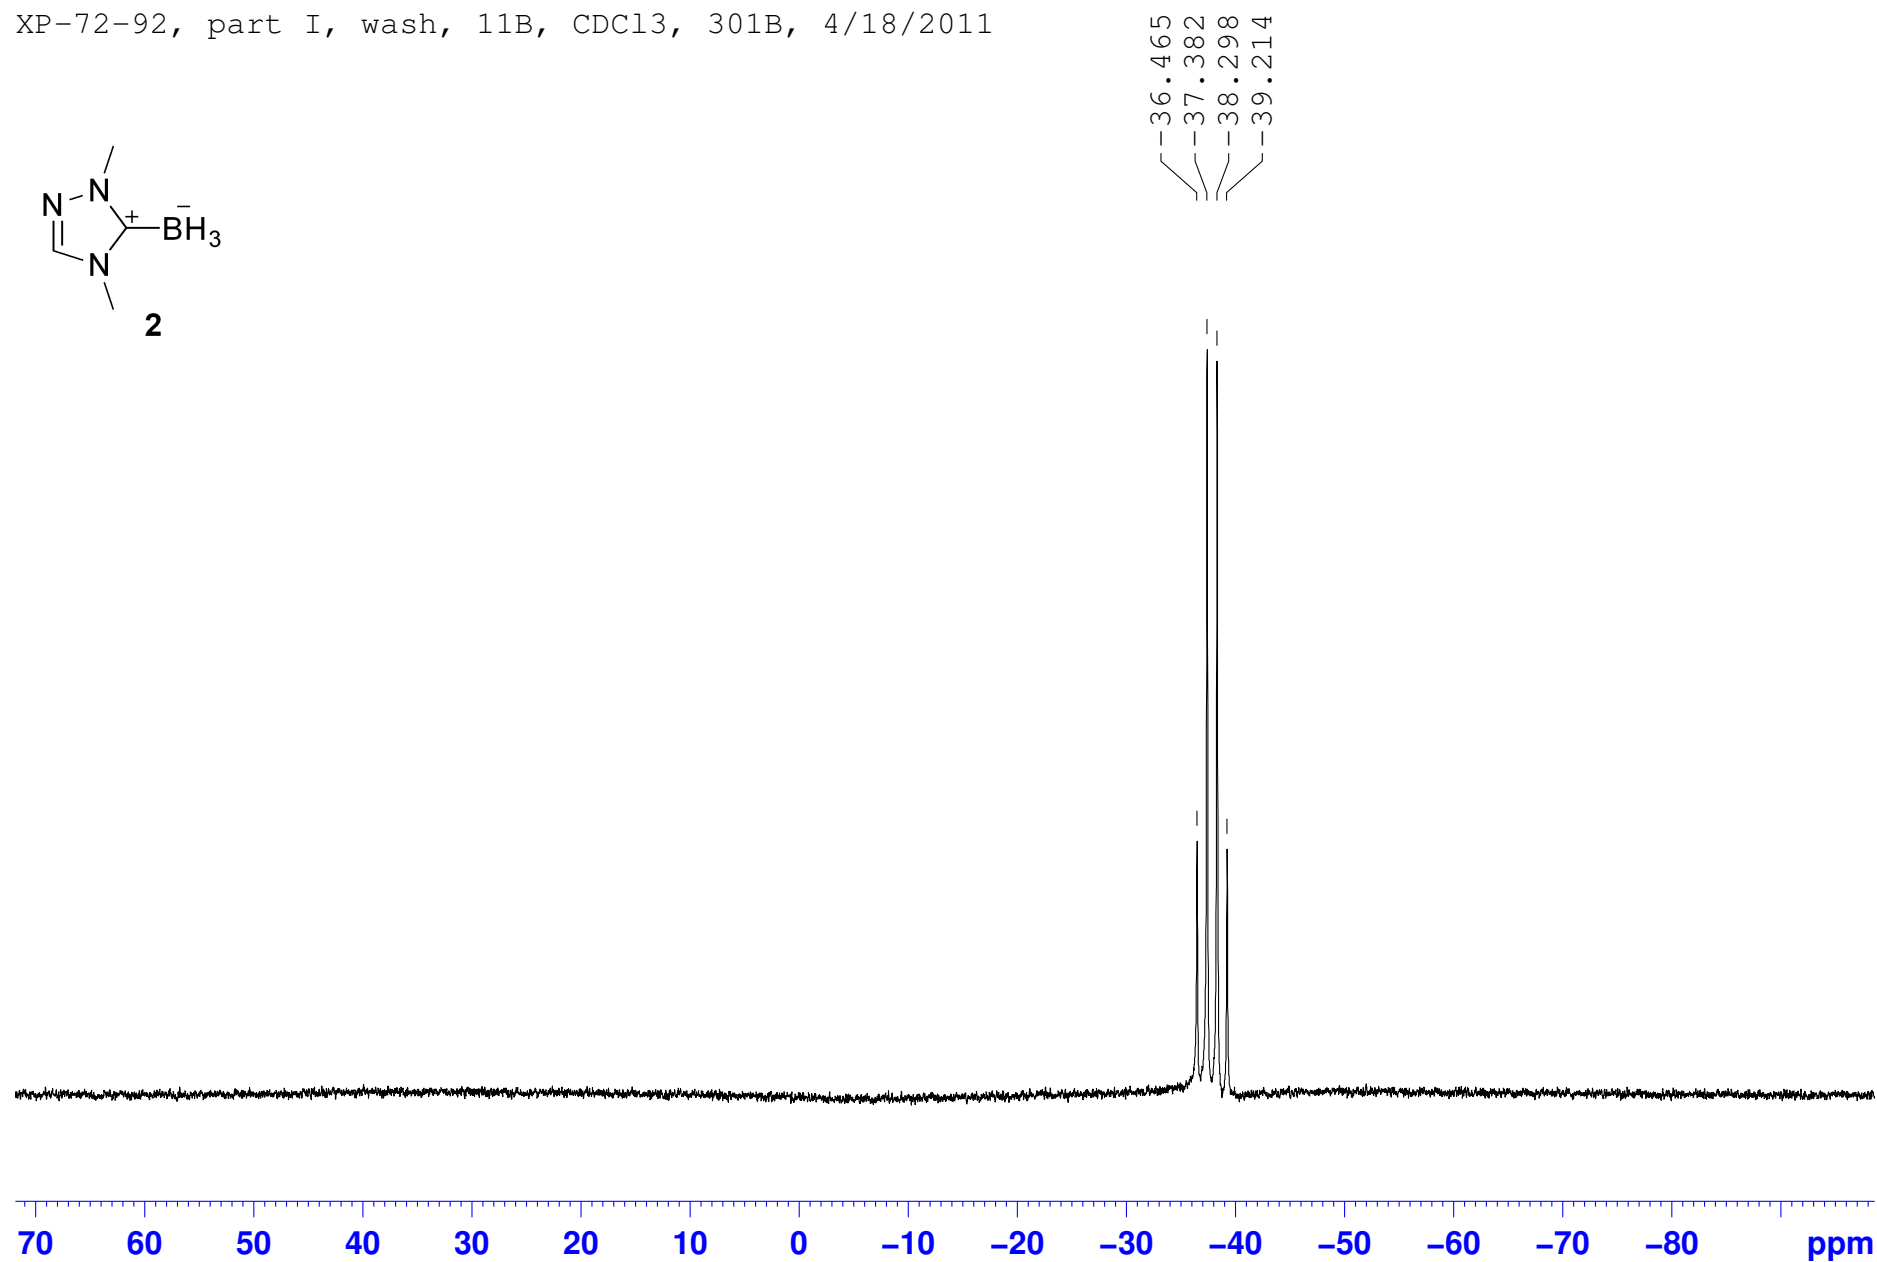

XP-59-82-purified,  $^1\text{H}$ ,  $\text{C}_6\text{D}_6$ , 400B, 11/22/2010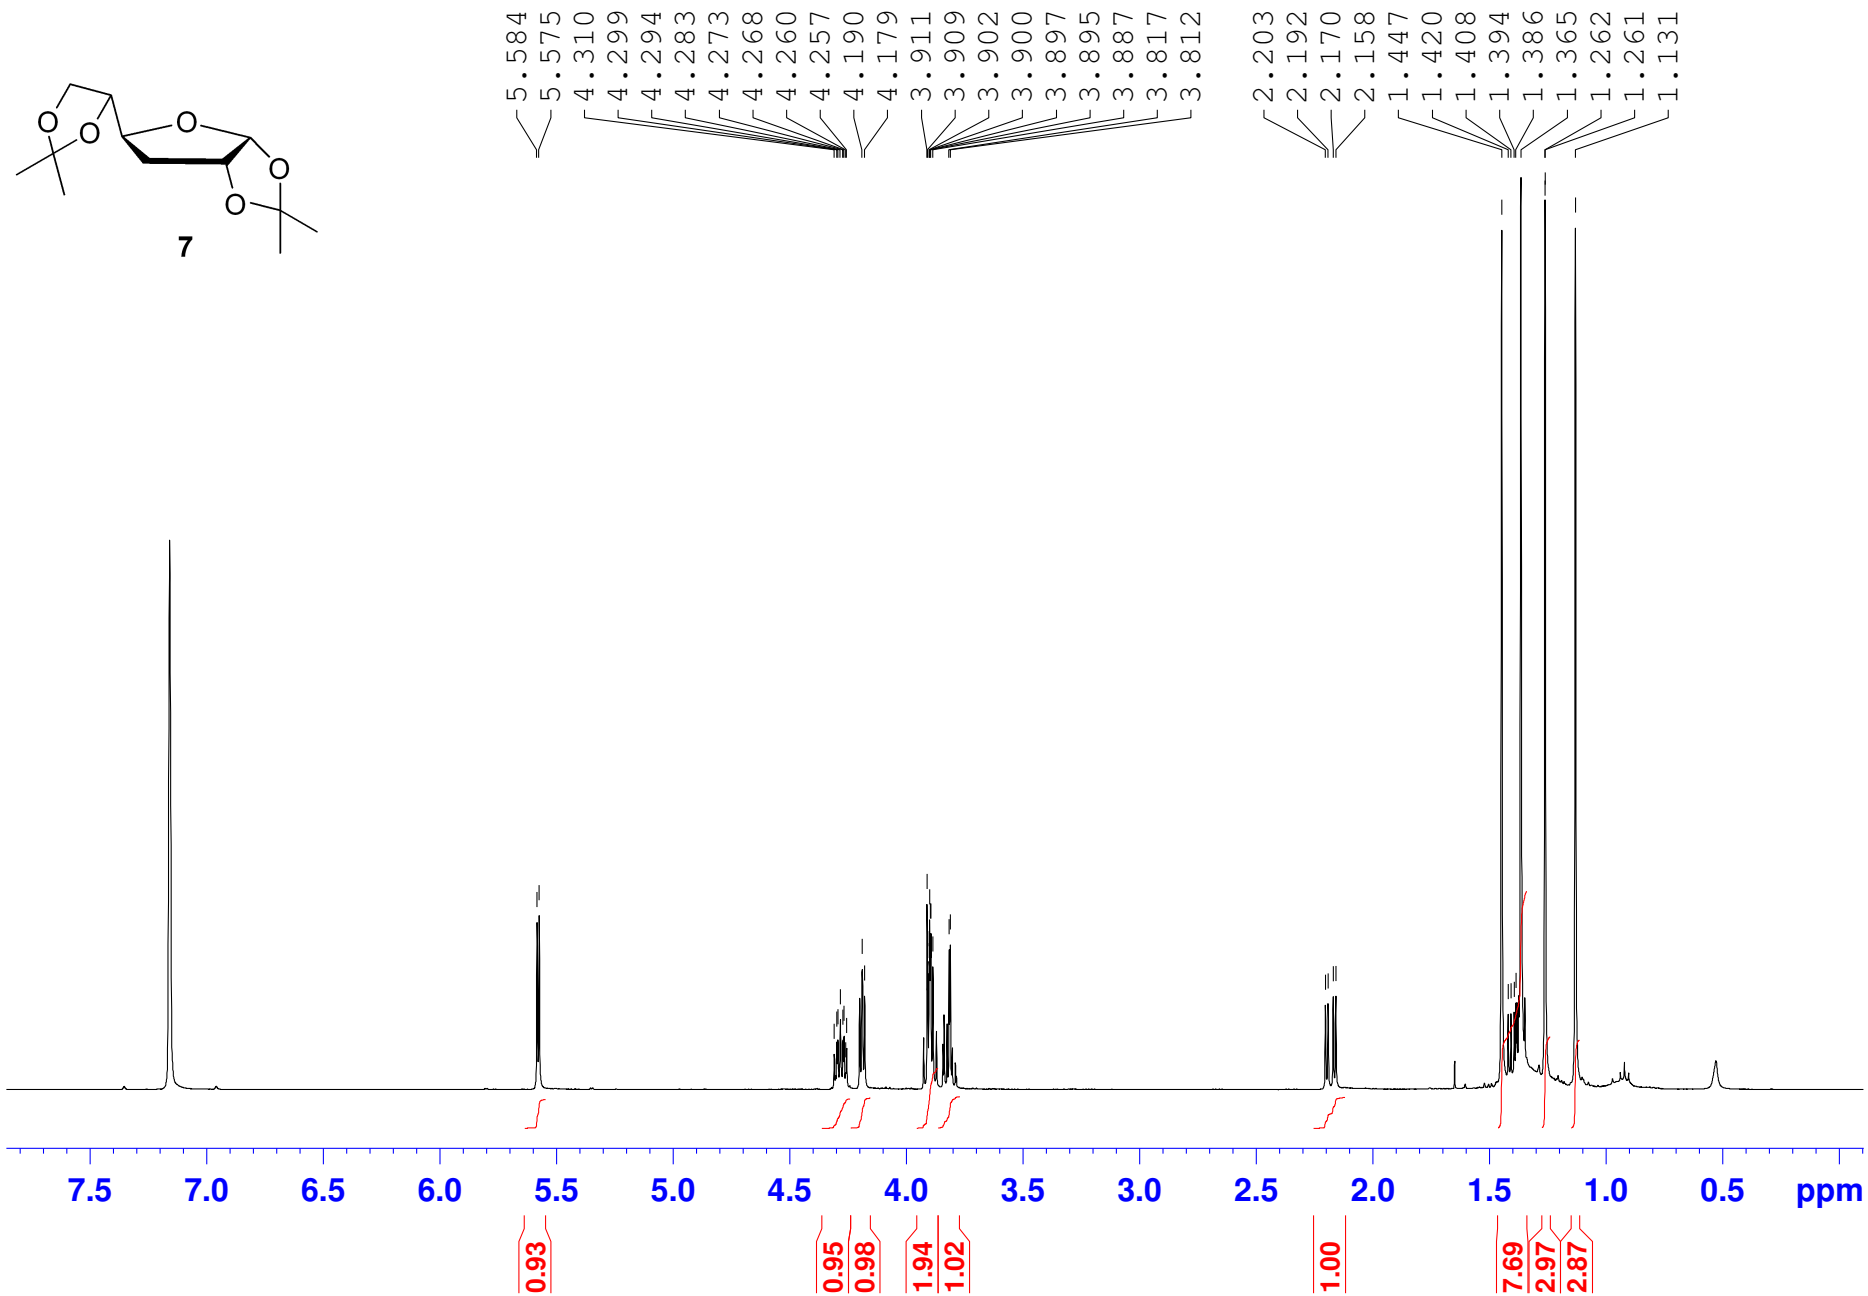

XP-66-86,  $^1\text{H}$ ,  $\text{CDCl}_3$ , 400A, 1/31/2011  
PROTON  $\text{CDCl}_3$  C:\Bruker\TOPSPIN curran 12

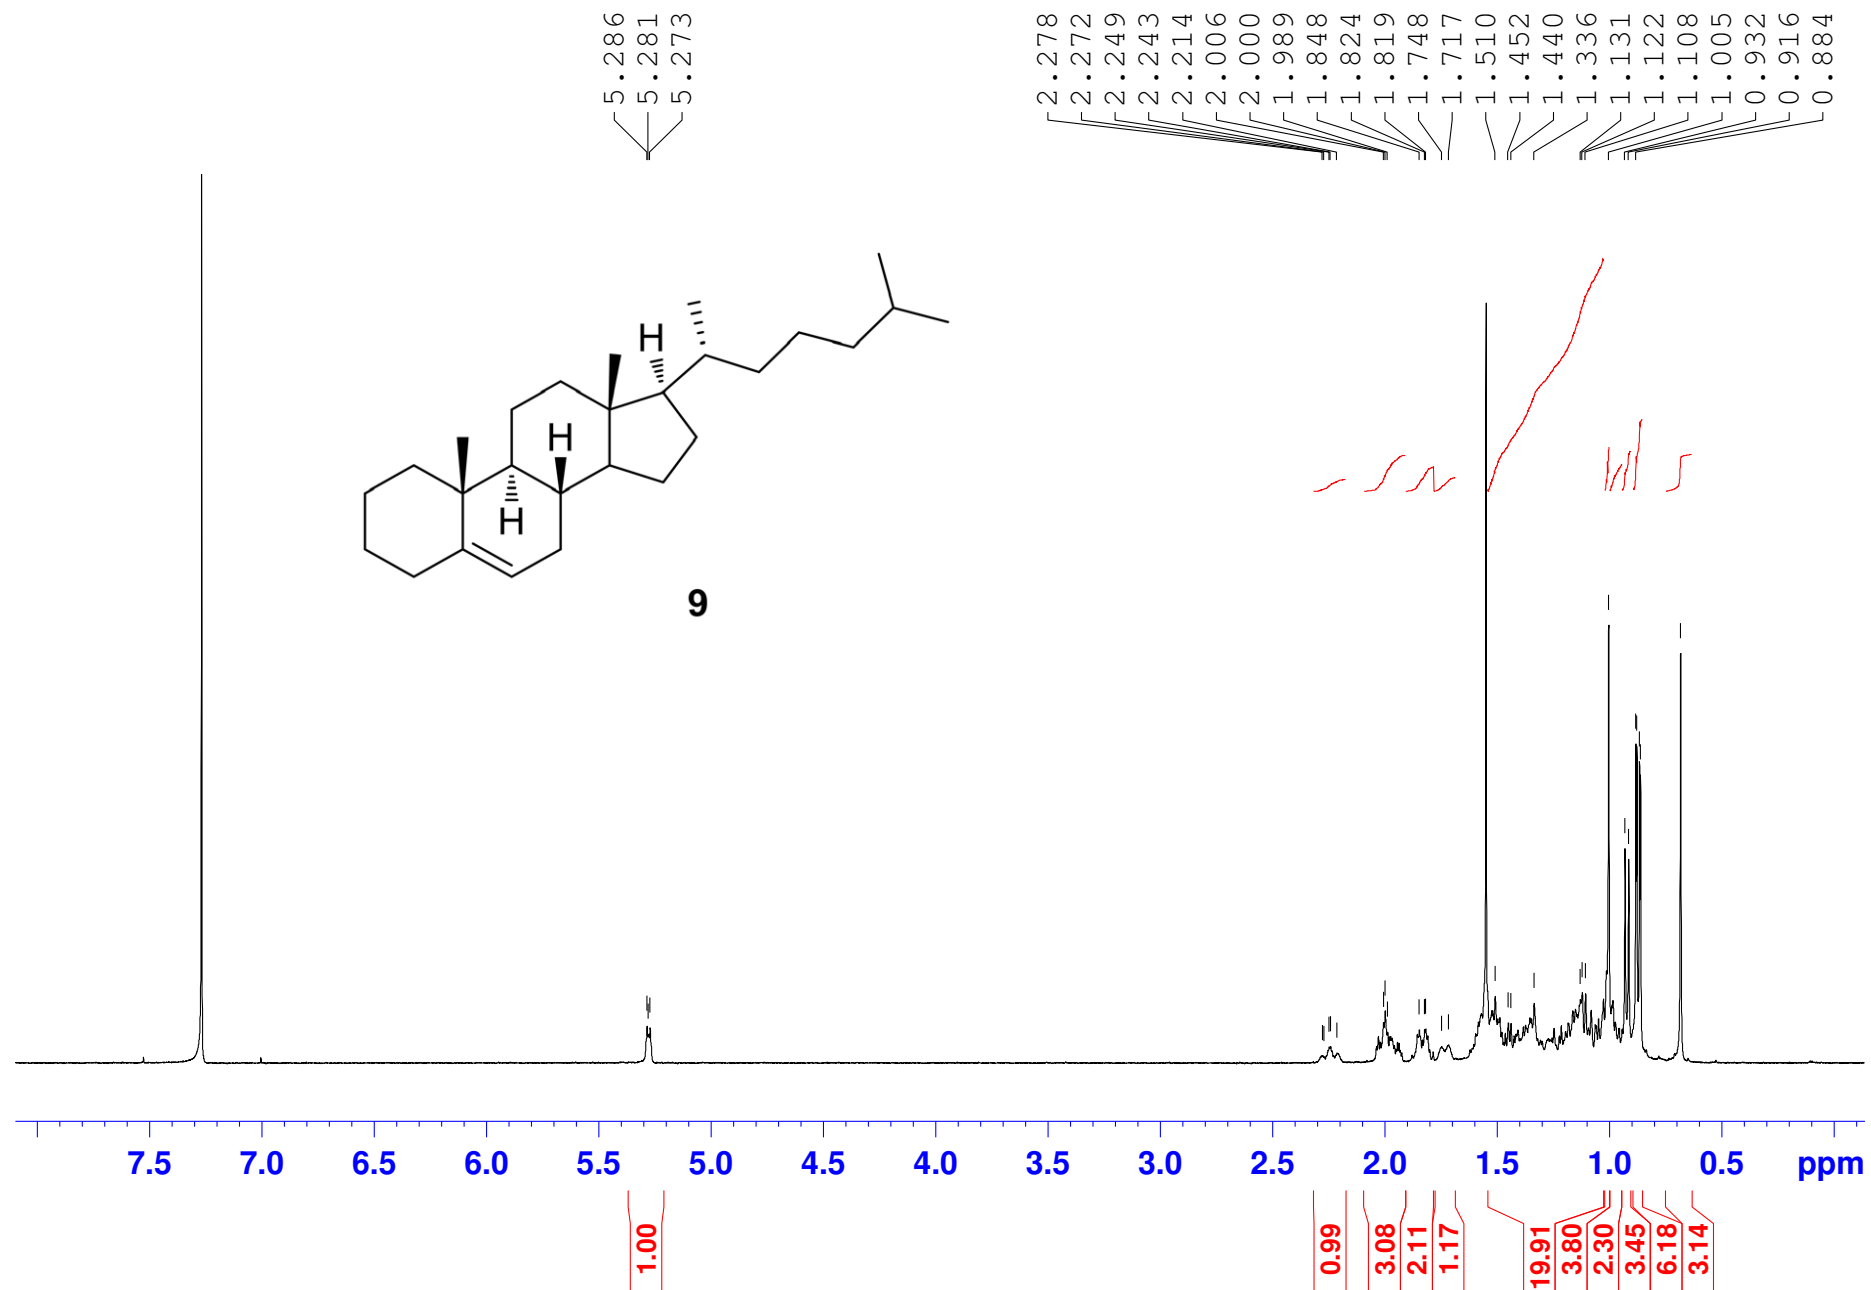

XP-66-89,  $^1\text{H}$ ,  $\text{CDCl}_3$ , 400A, 2/3/2011  
PROTON  $\text{CDCl}_3$  C:\Bruker\TOPSPIN curran 2

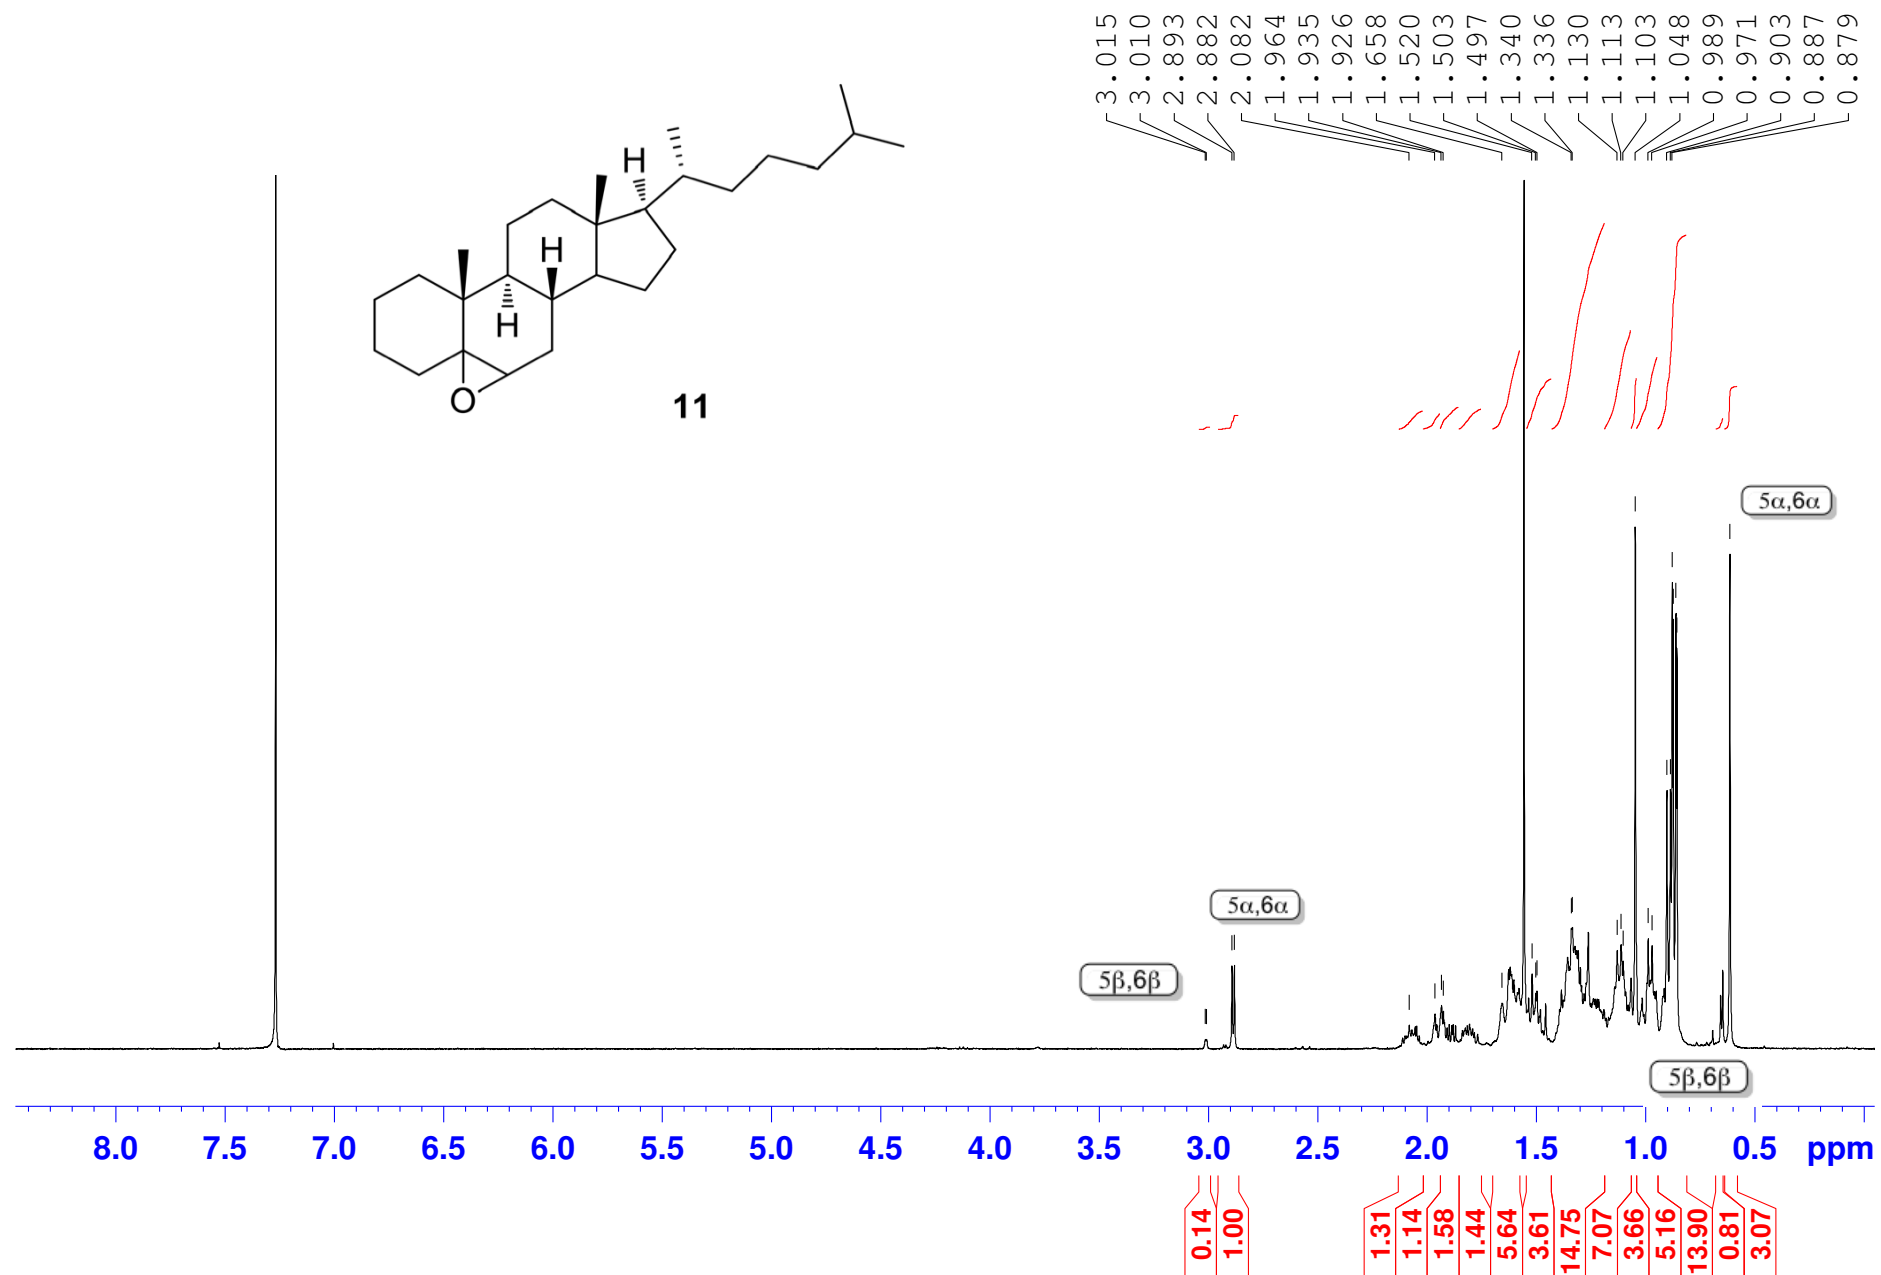

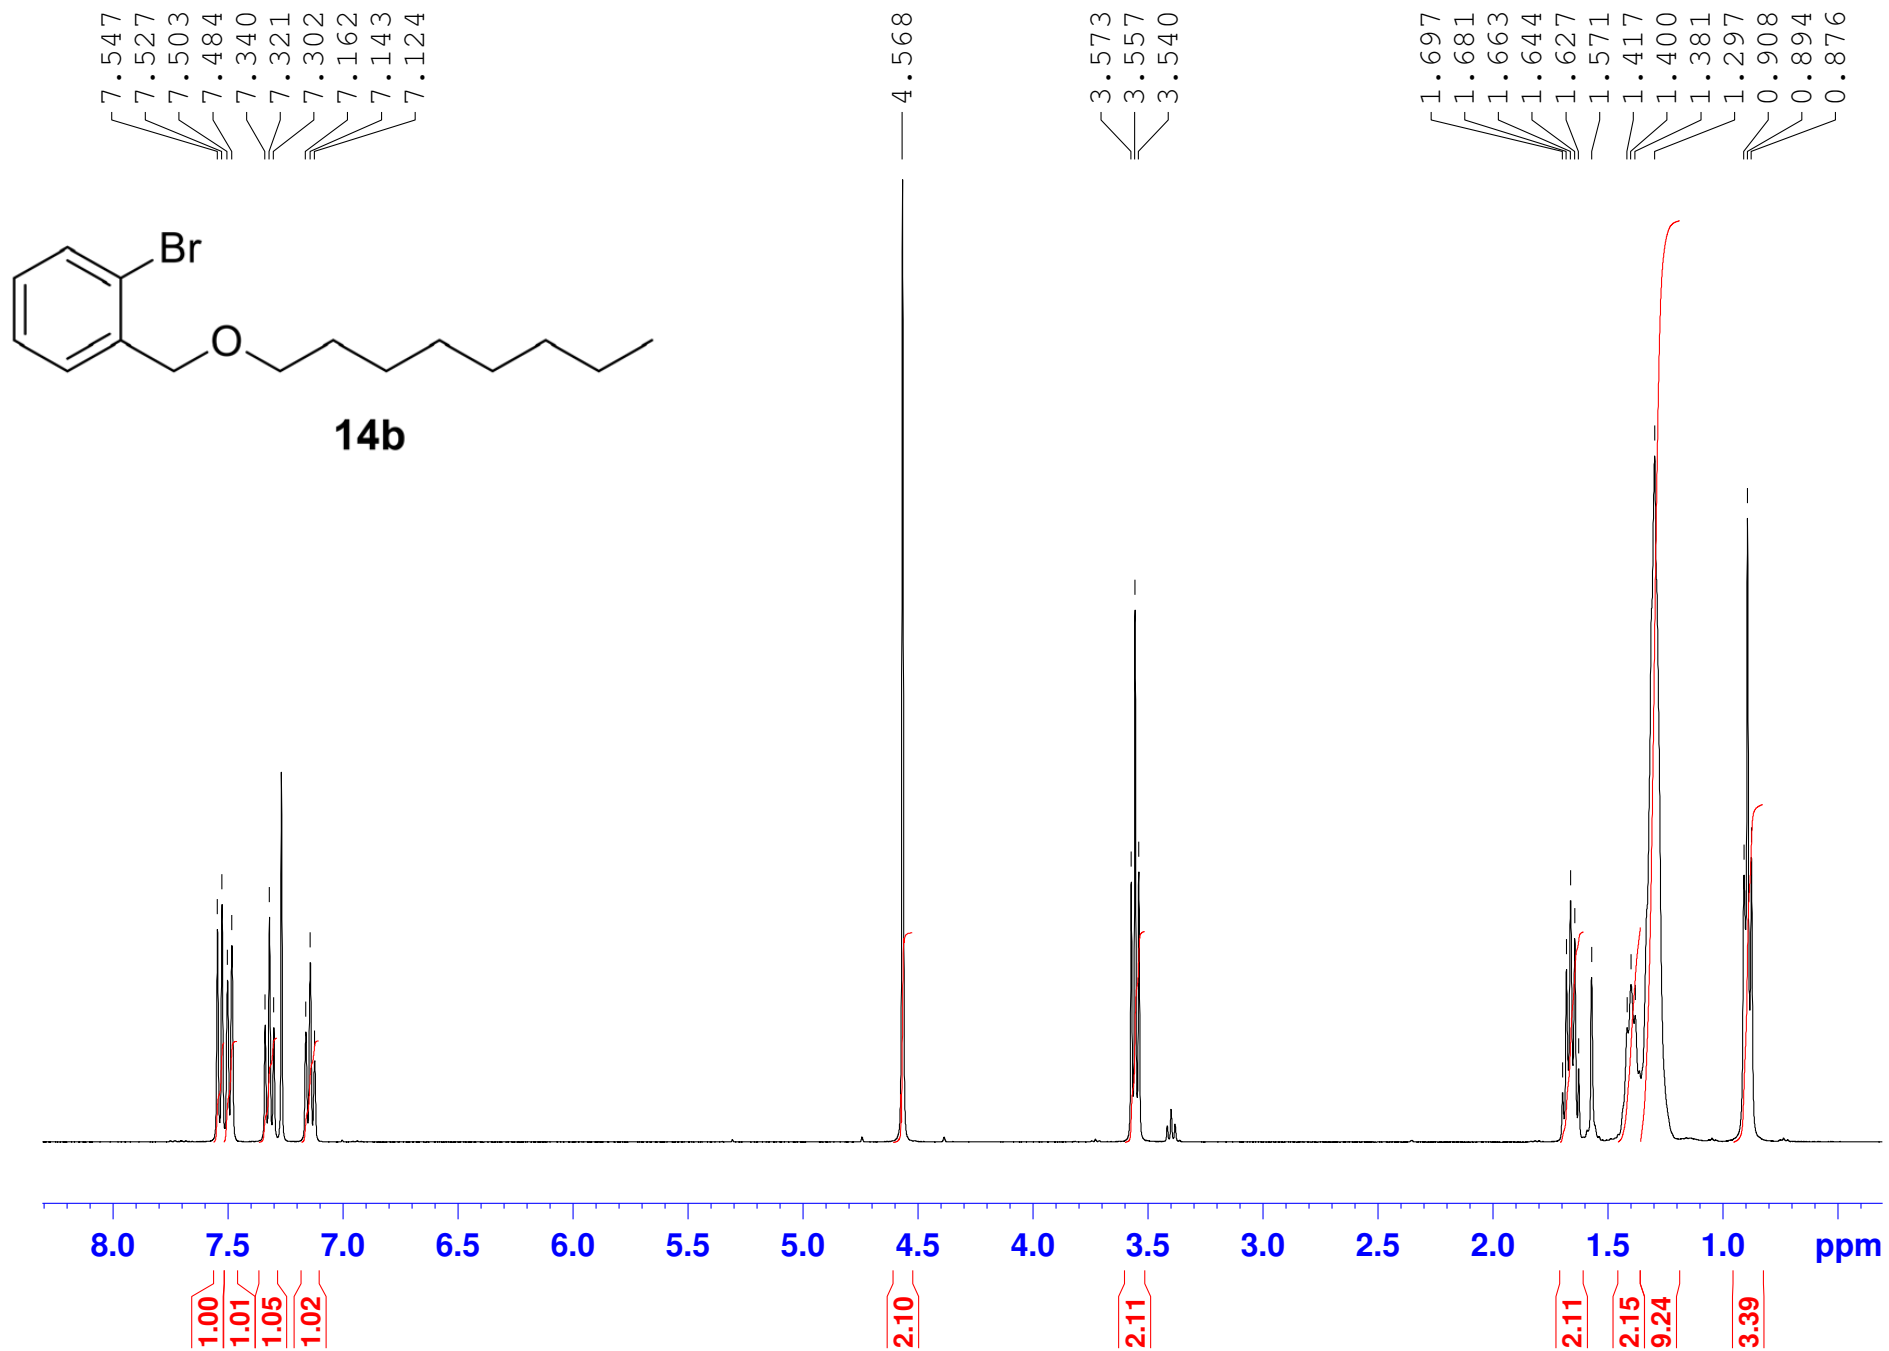

XP octyl 1-bromobenzyl ether, 400B, CDCl<sub>3</sub>, 5/14/2011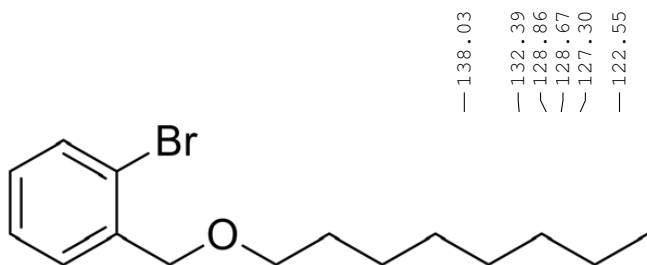**14b**

— 138.03  
— 132.39  
— 128.86  
— 128.67  
— 127.30  
— 122.55

— 72.03  
— 71.05

— 31.82  
— 29.74  
— 29.43  
— 29.26  
— 26.19  
— 22.65

— 14.09

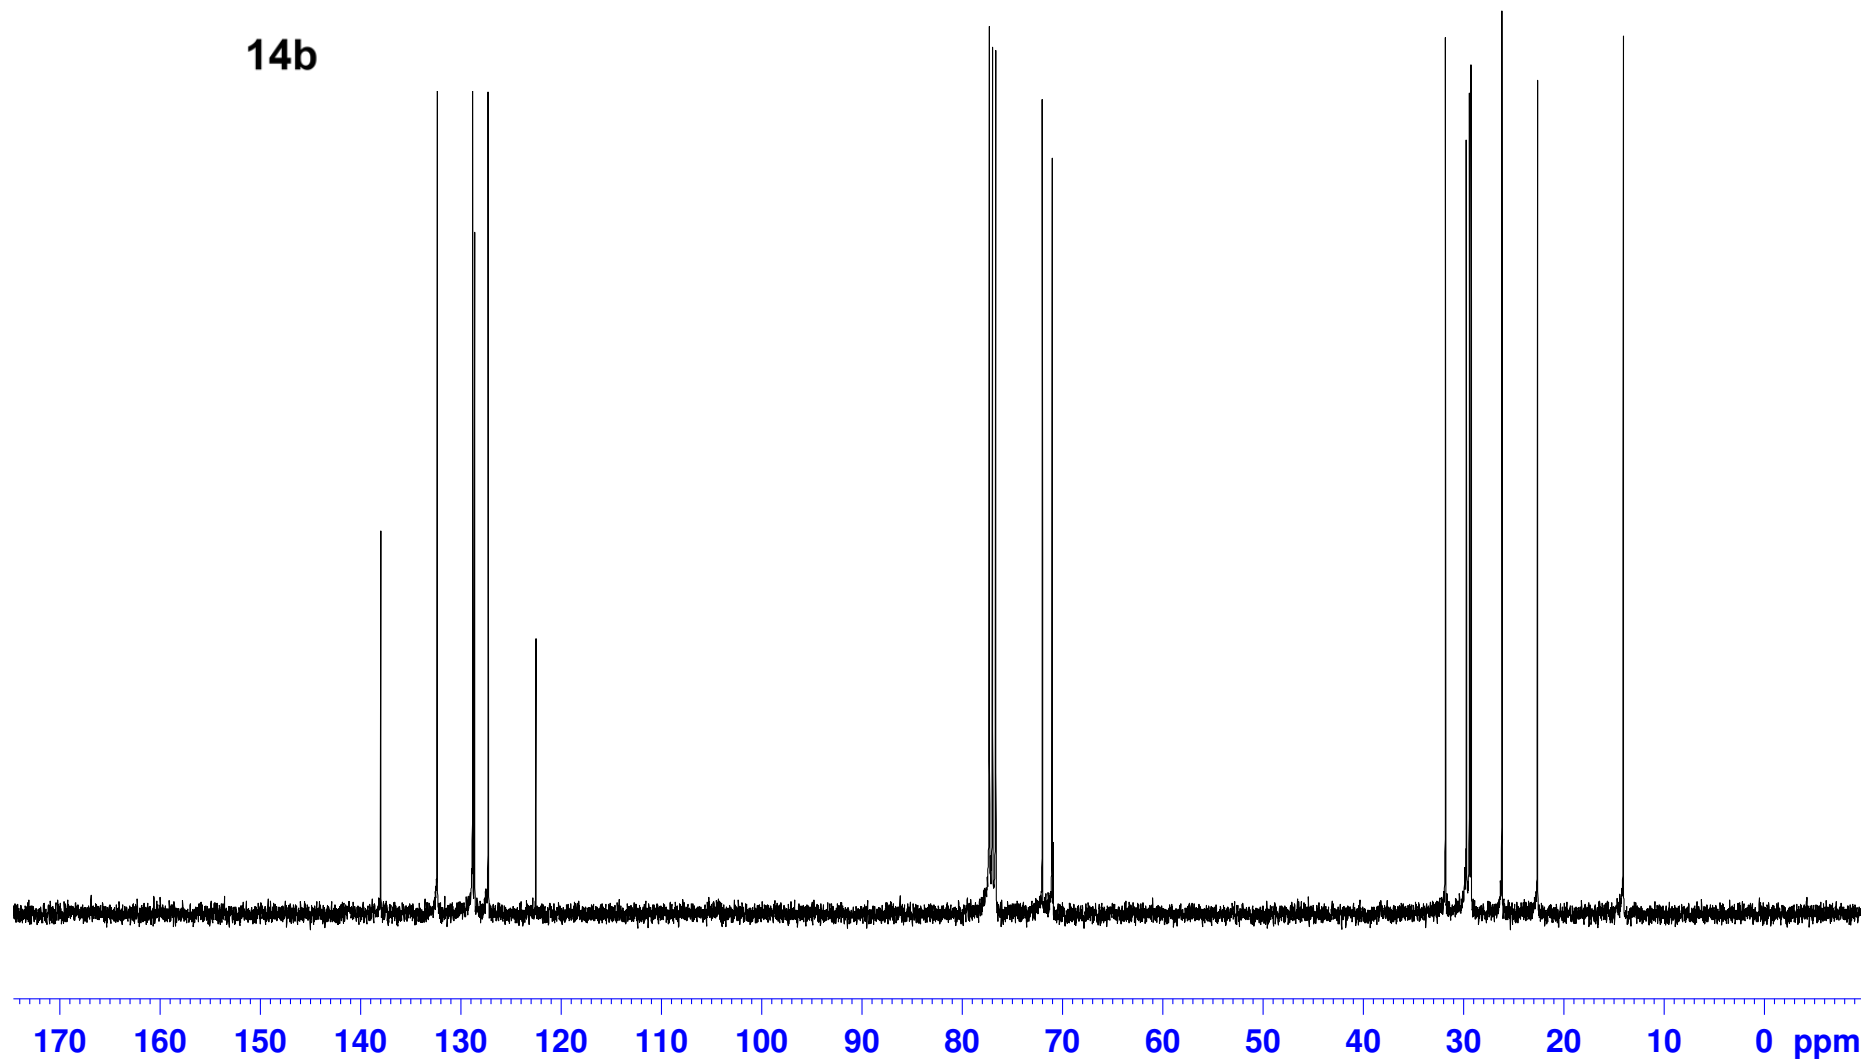



XP-80-65,  $^1\text{H}$ , pdt,  $\text{CDCl}_3$ , 301B, 11/14/2011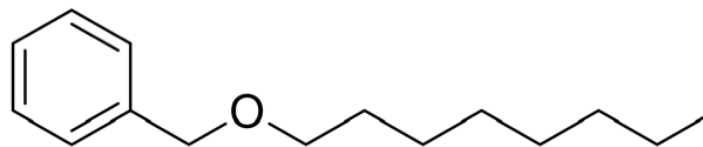**15**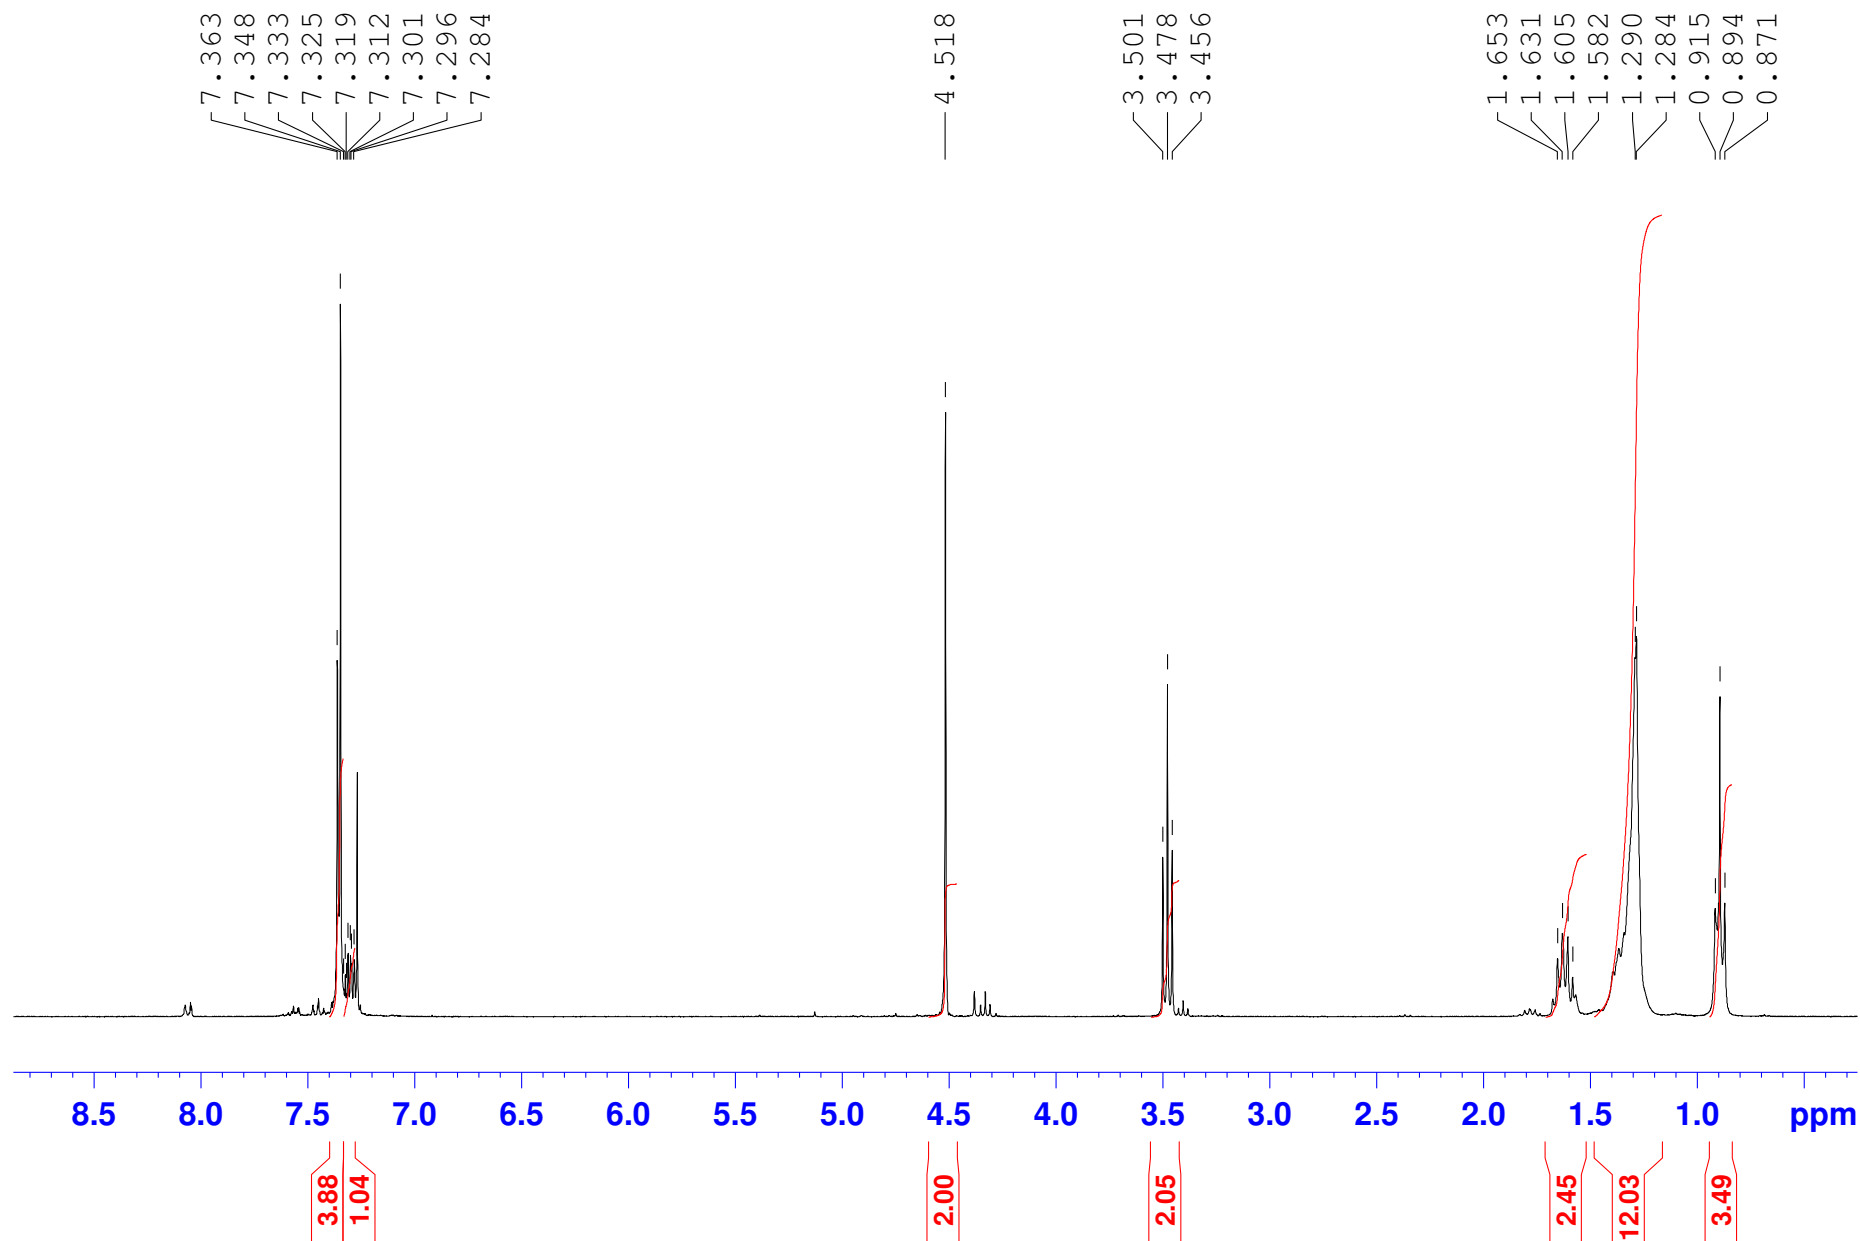

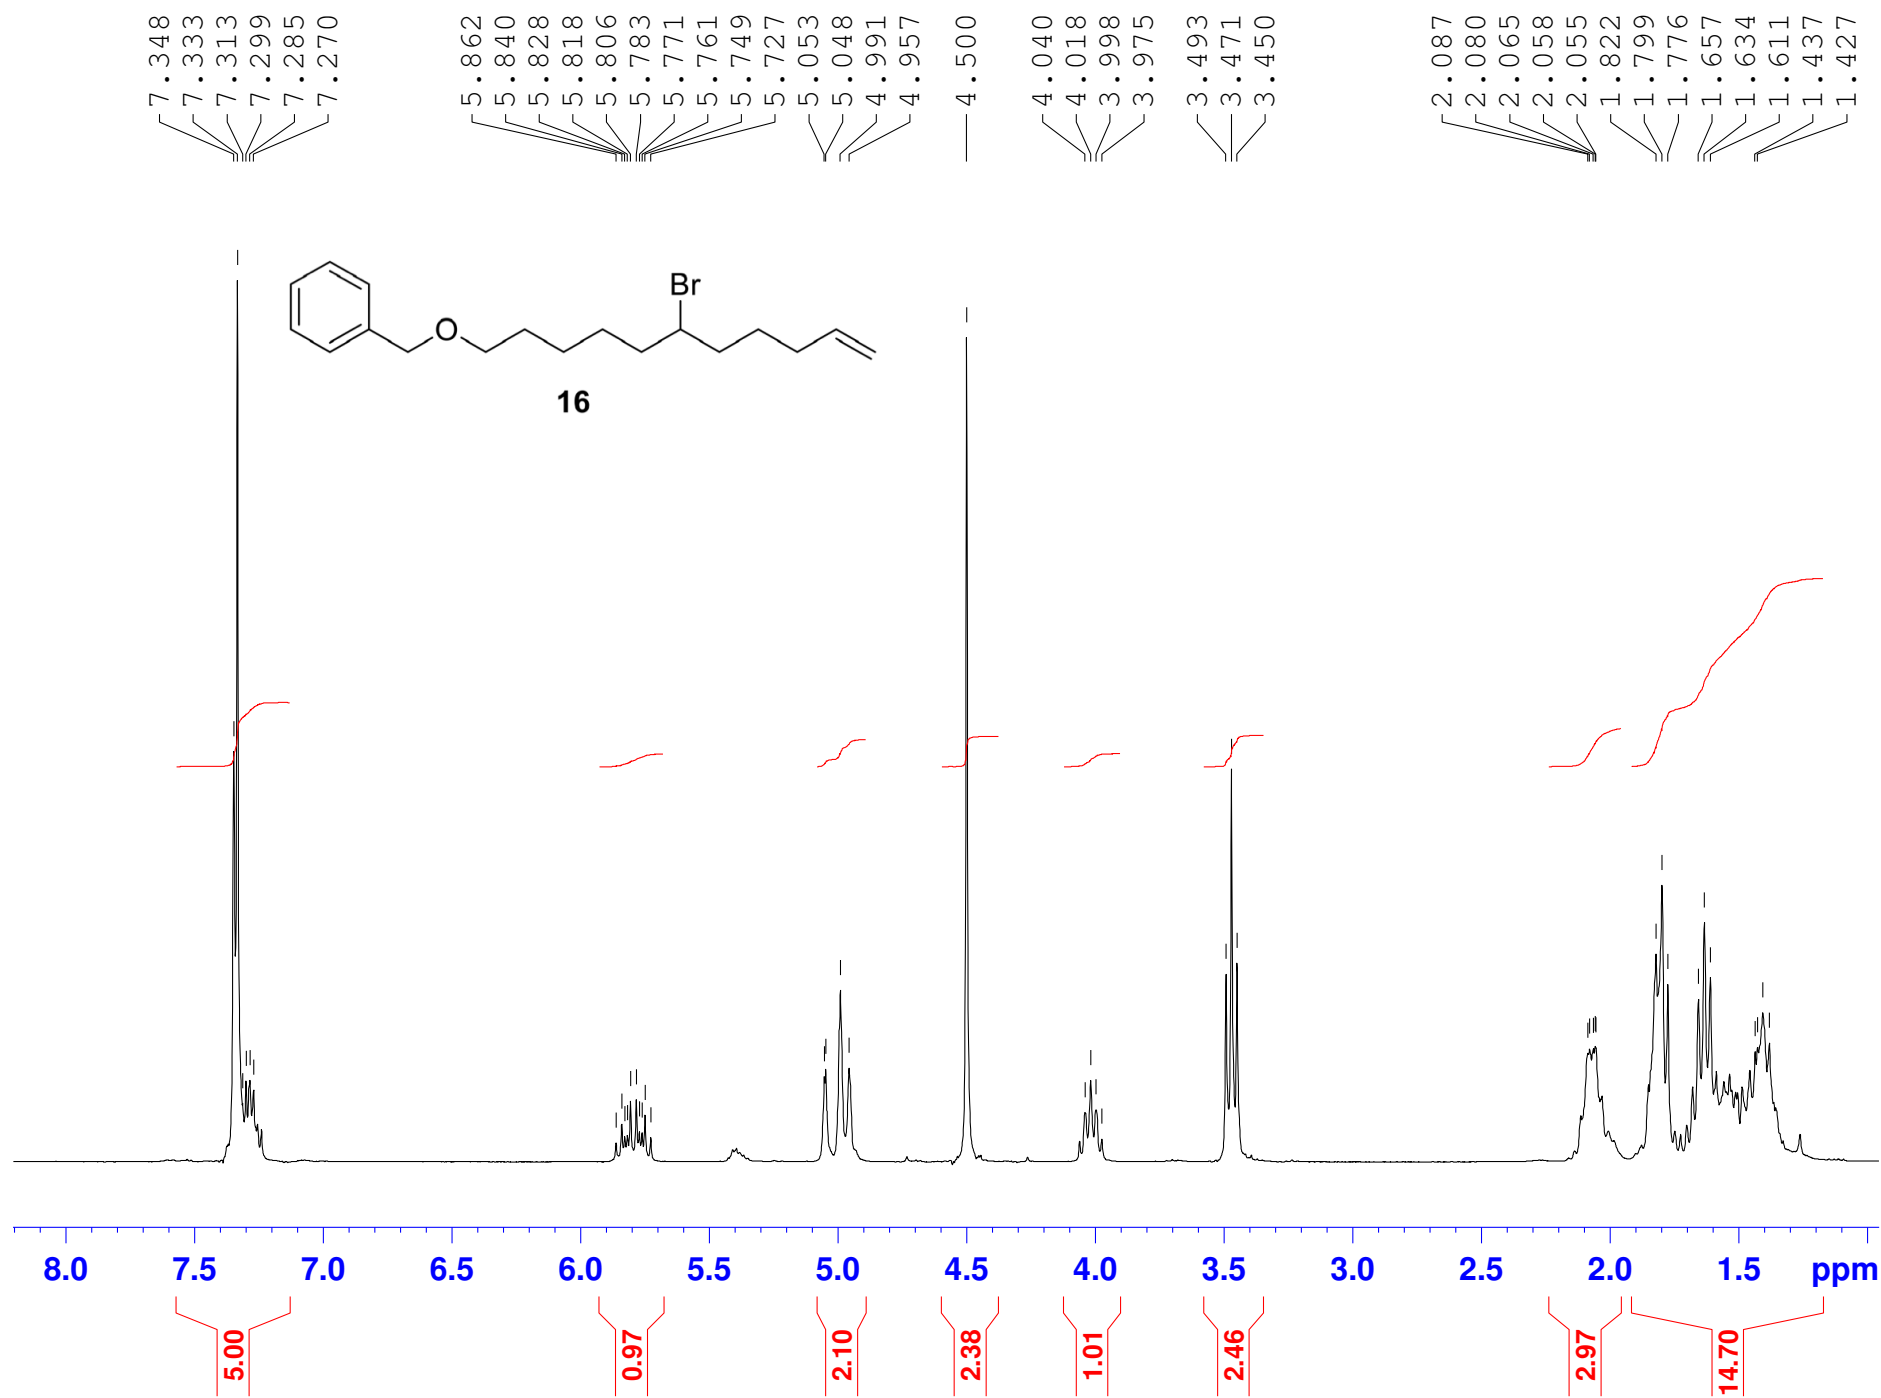

138.54  
138.19

128.28  
127.54  
127.43

114.86

77.43  
77.00  
76.58  
72.82  
70.15

58.31

39.02  
38.41

33.01

29.54  
27.32  
26.69  
25.60

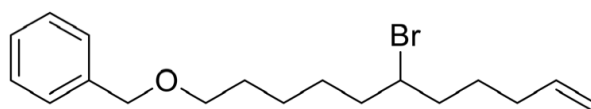

**16**

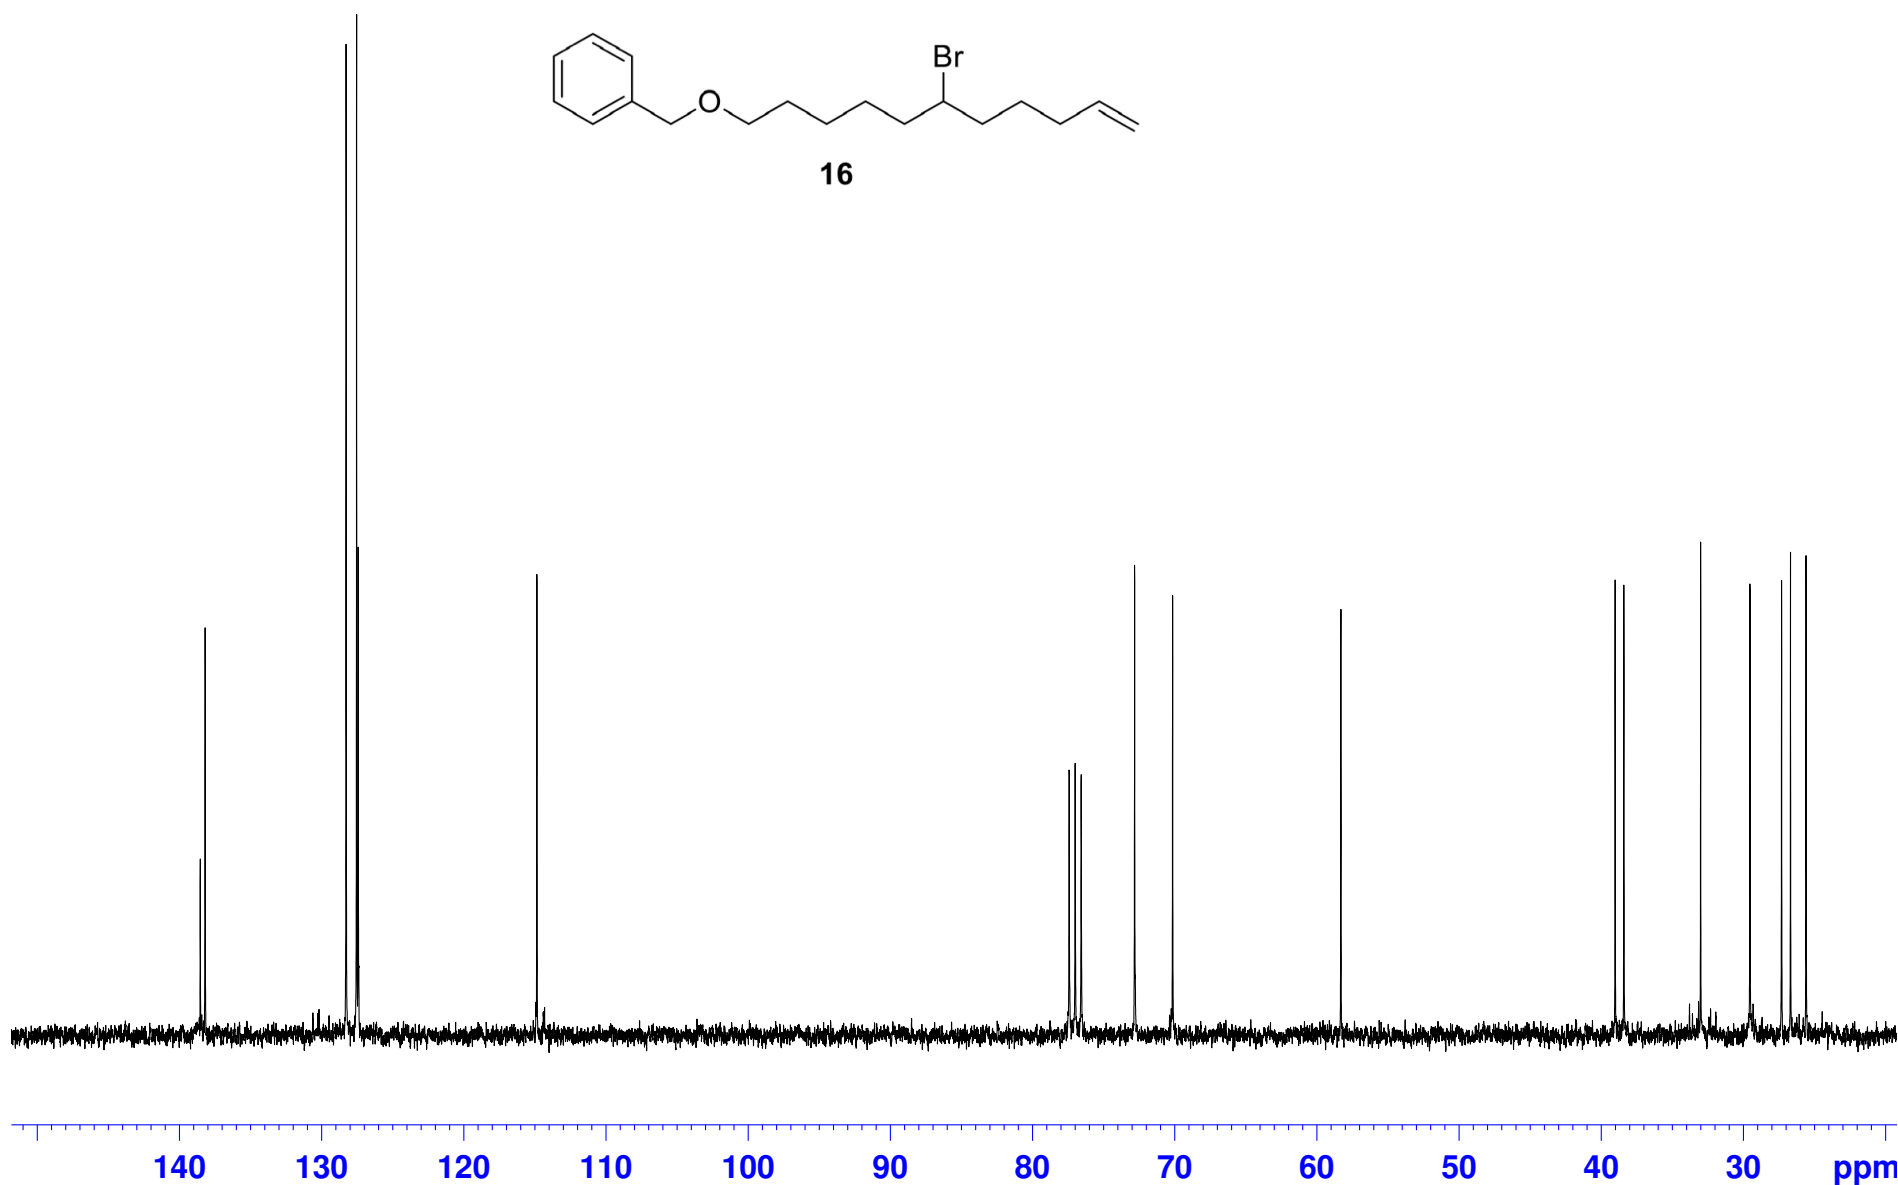

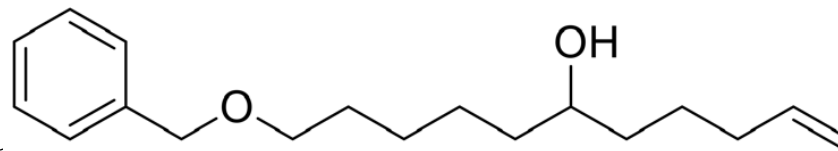XP 11-(benzyloxy)undec-1-en-6-ol, CDCl<sub>3</sub>, 301B, 5/12/201**16-III**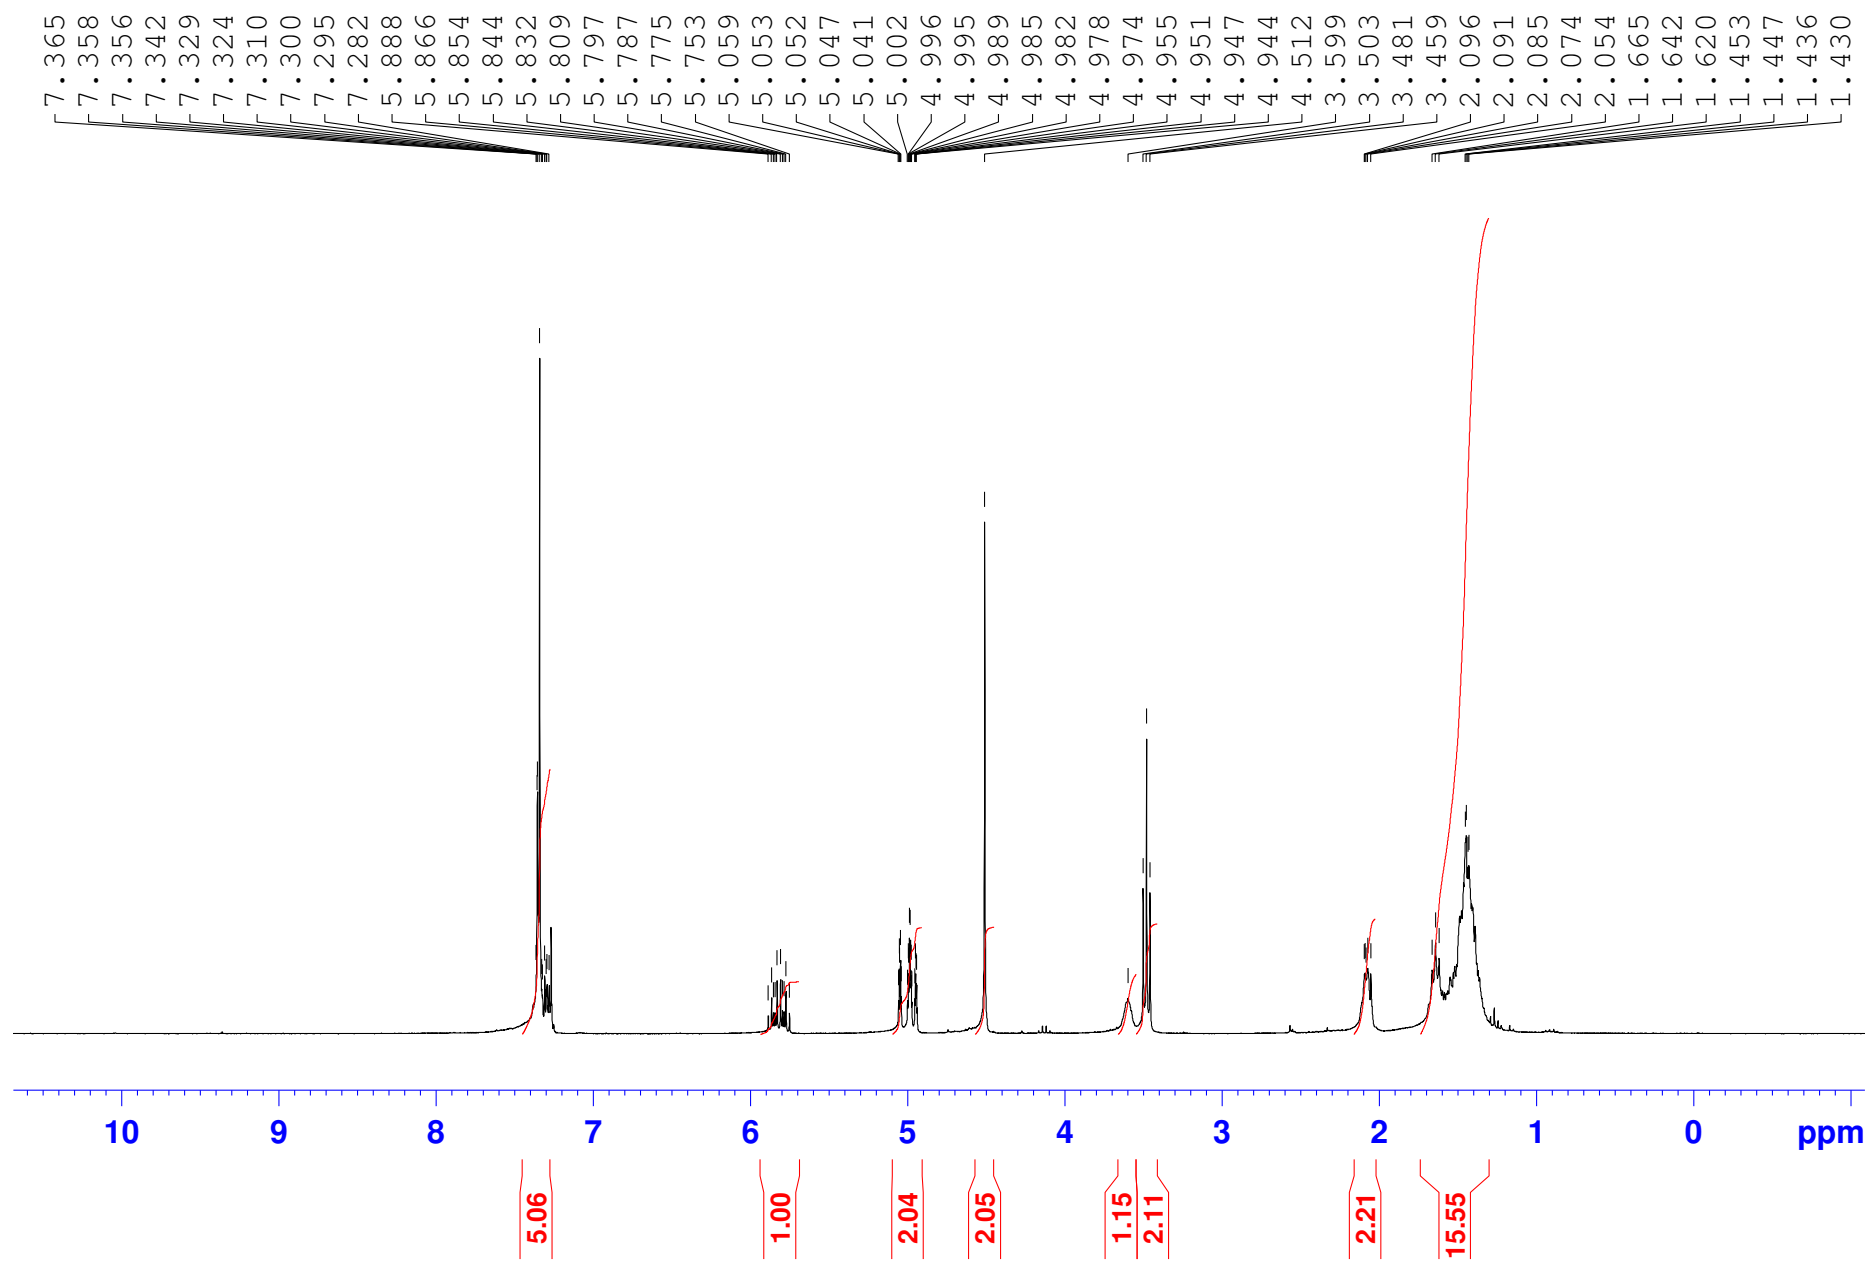

XP 11-(benzyloxy)undec-1-en-6-ol, 400B, CDCl<sub>3</sub>, 5/14/2011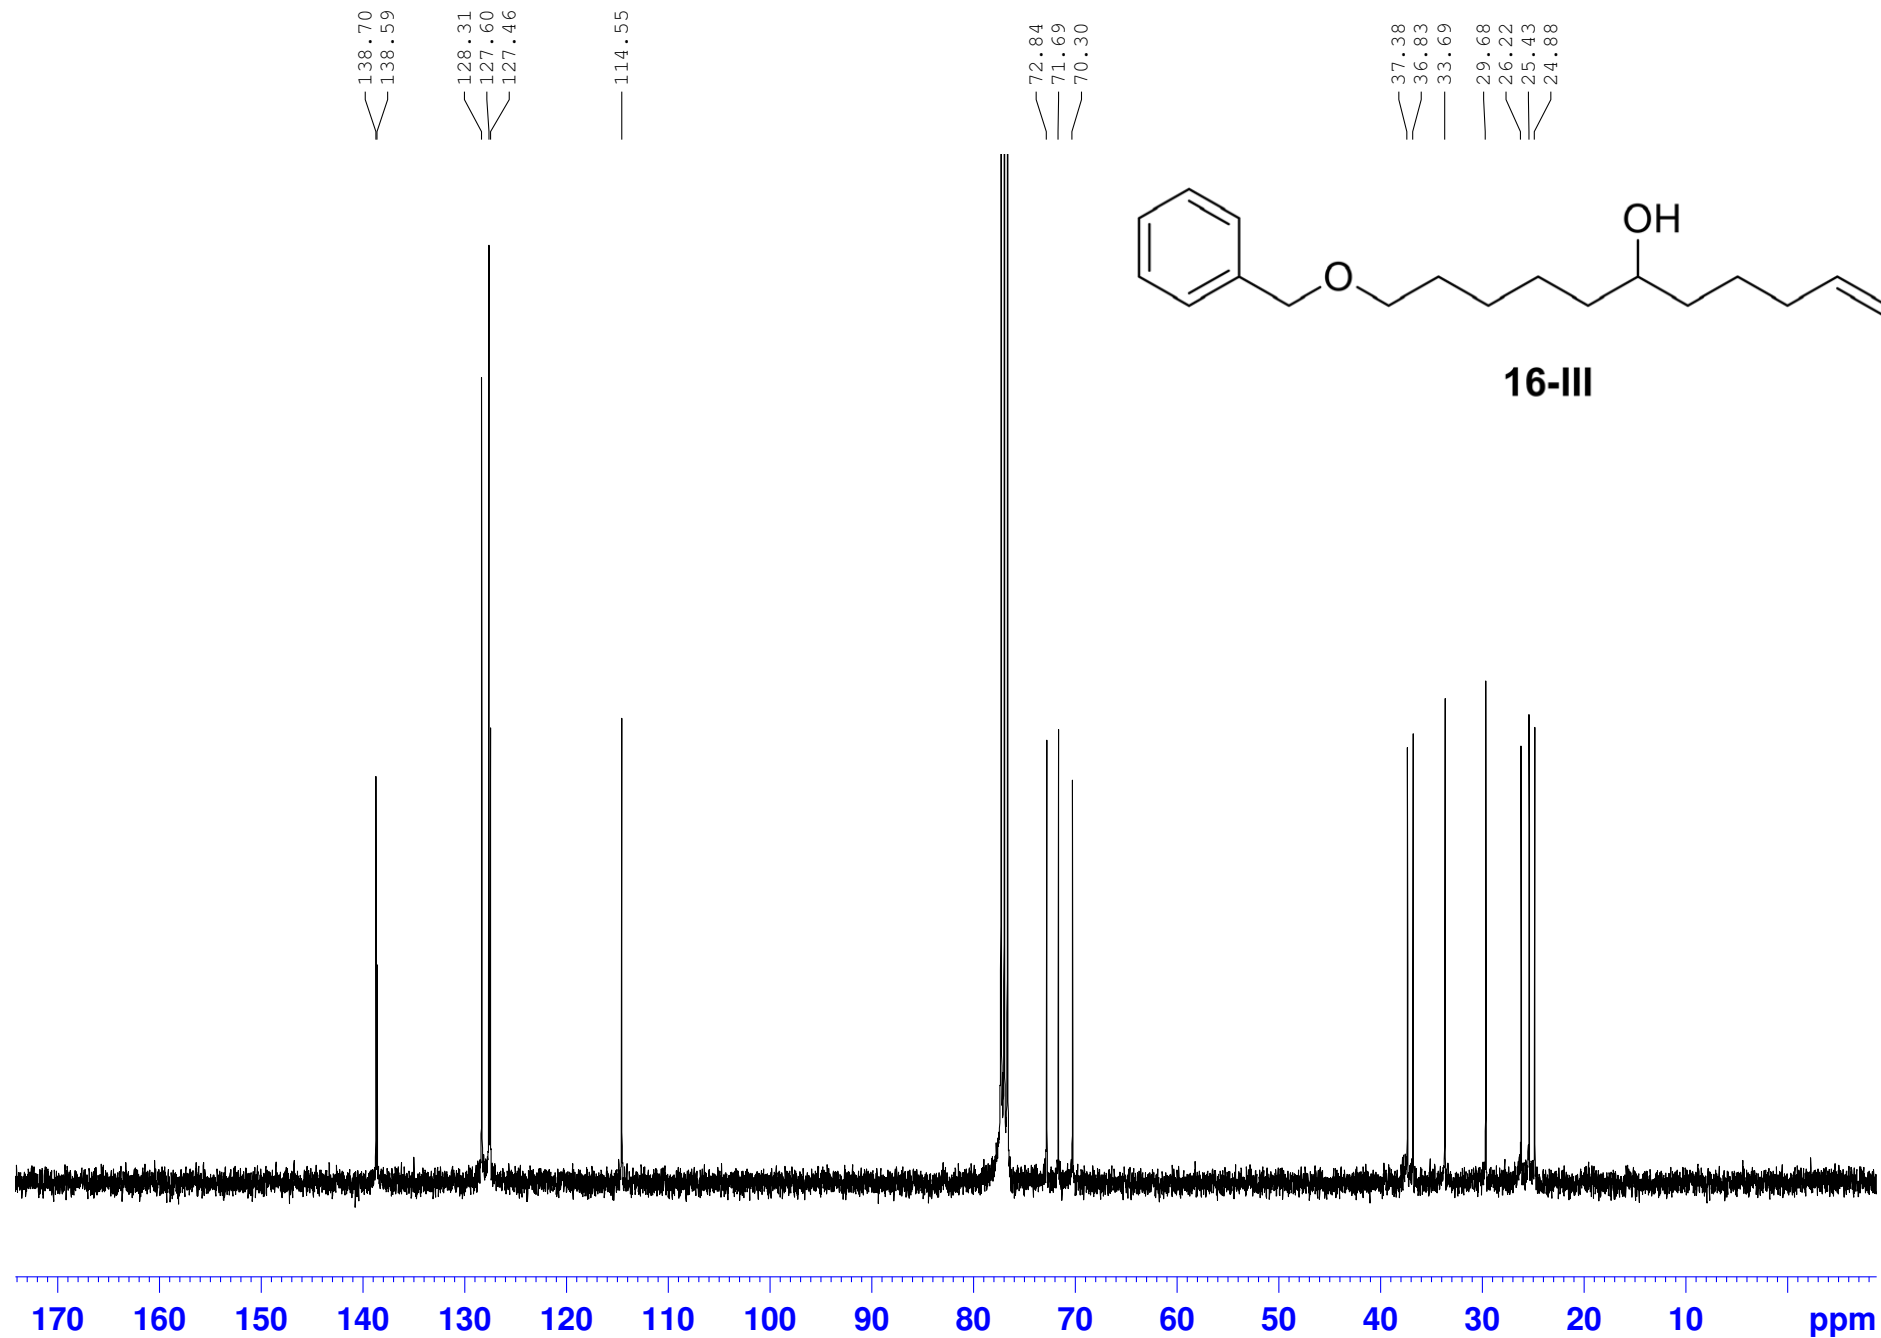

XP-66-64, 13-14, 1H, C6D6, 400A, 1/6/2010  
PROTON C6D6 C:\Bruker\TOPSPIN wipf 21

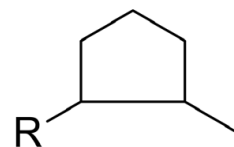

R = (CH<sub>2</sub>)<sub>5</sub>-OBn

+

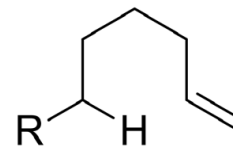

R = (CH<sub>2</sub>)<sub>5</sub>-OBn

2C halide reductions

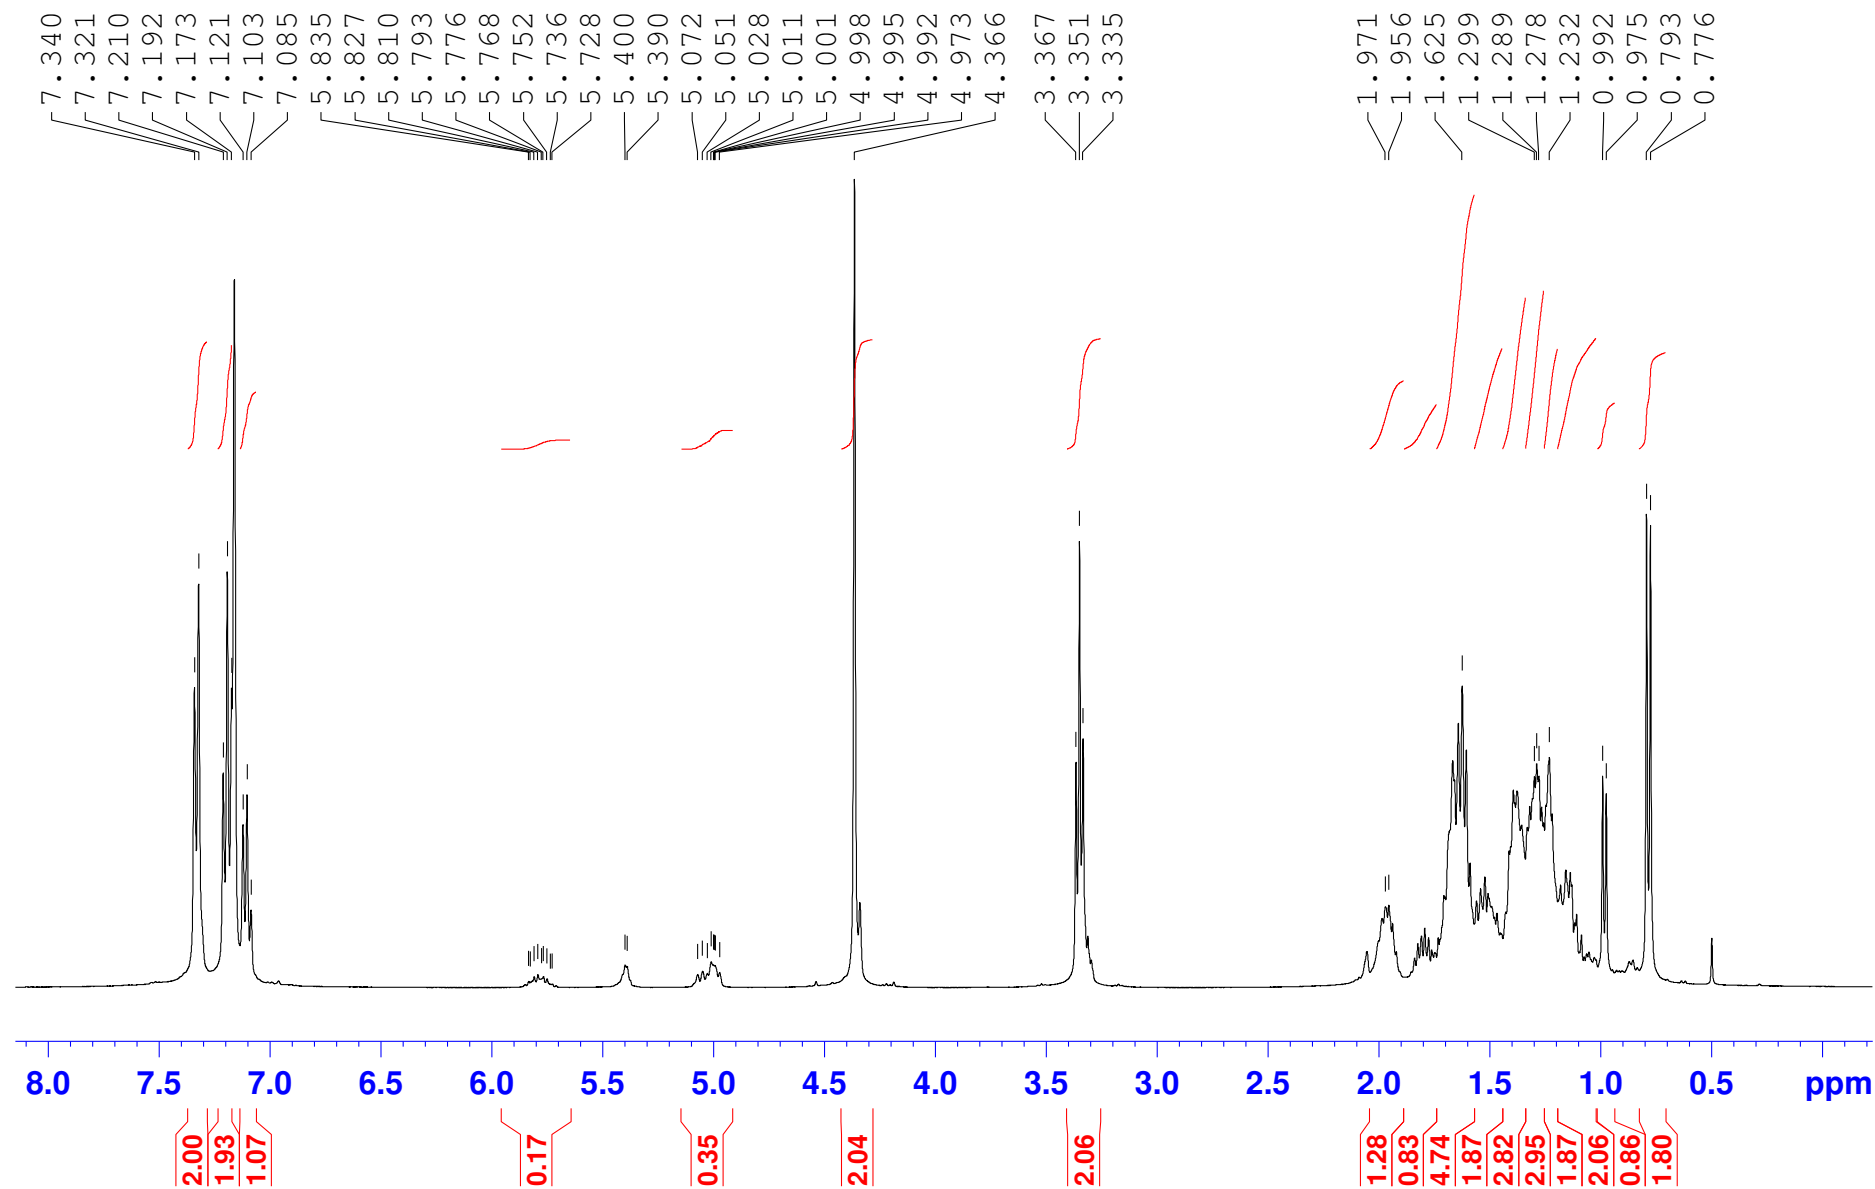

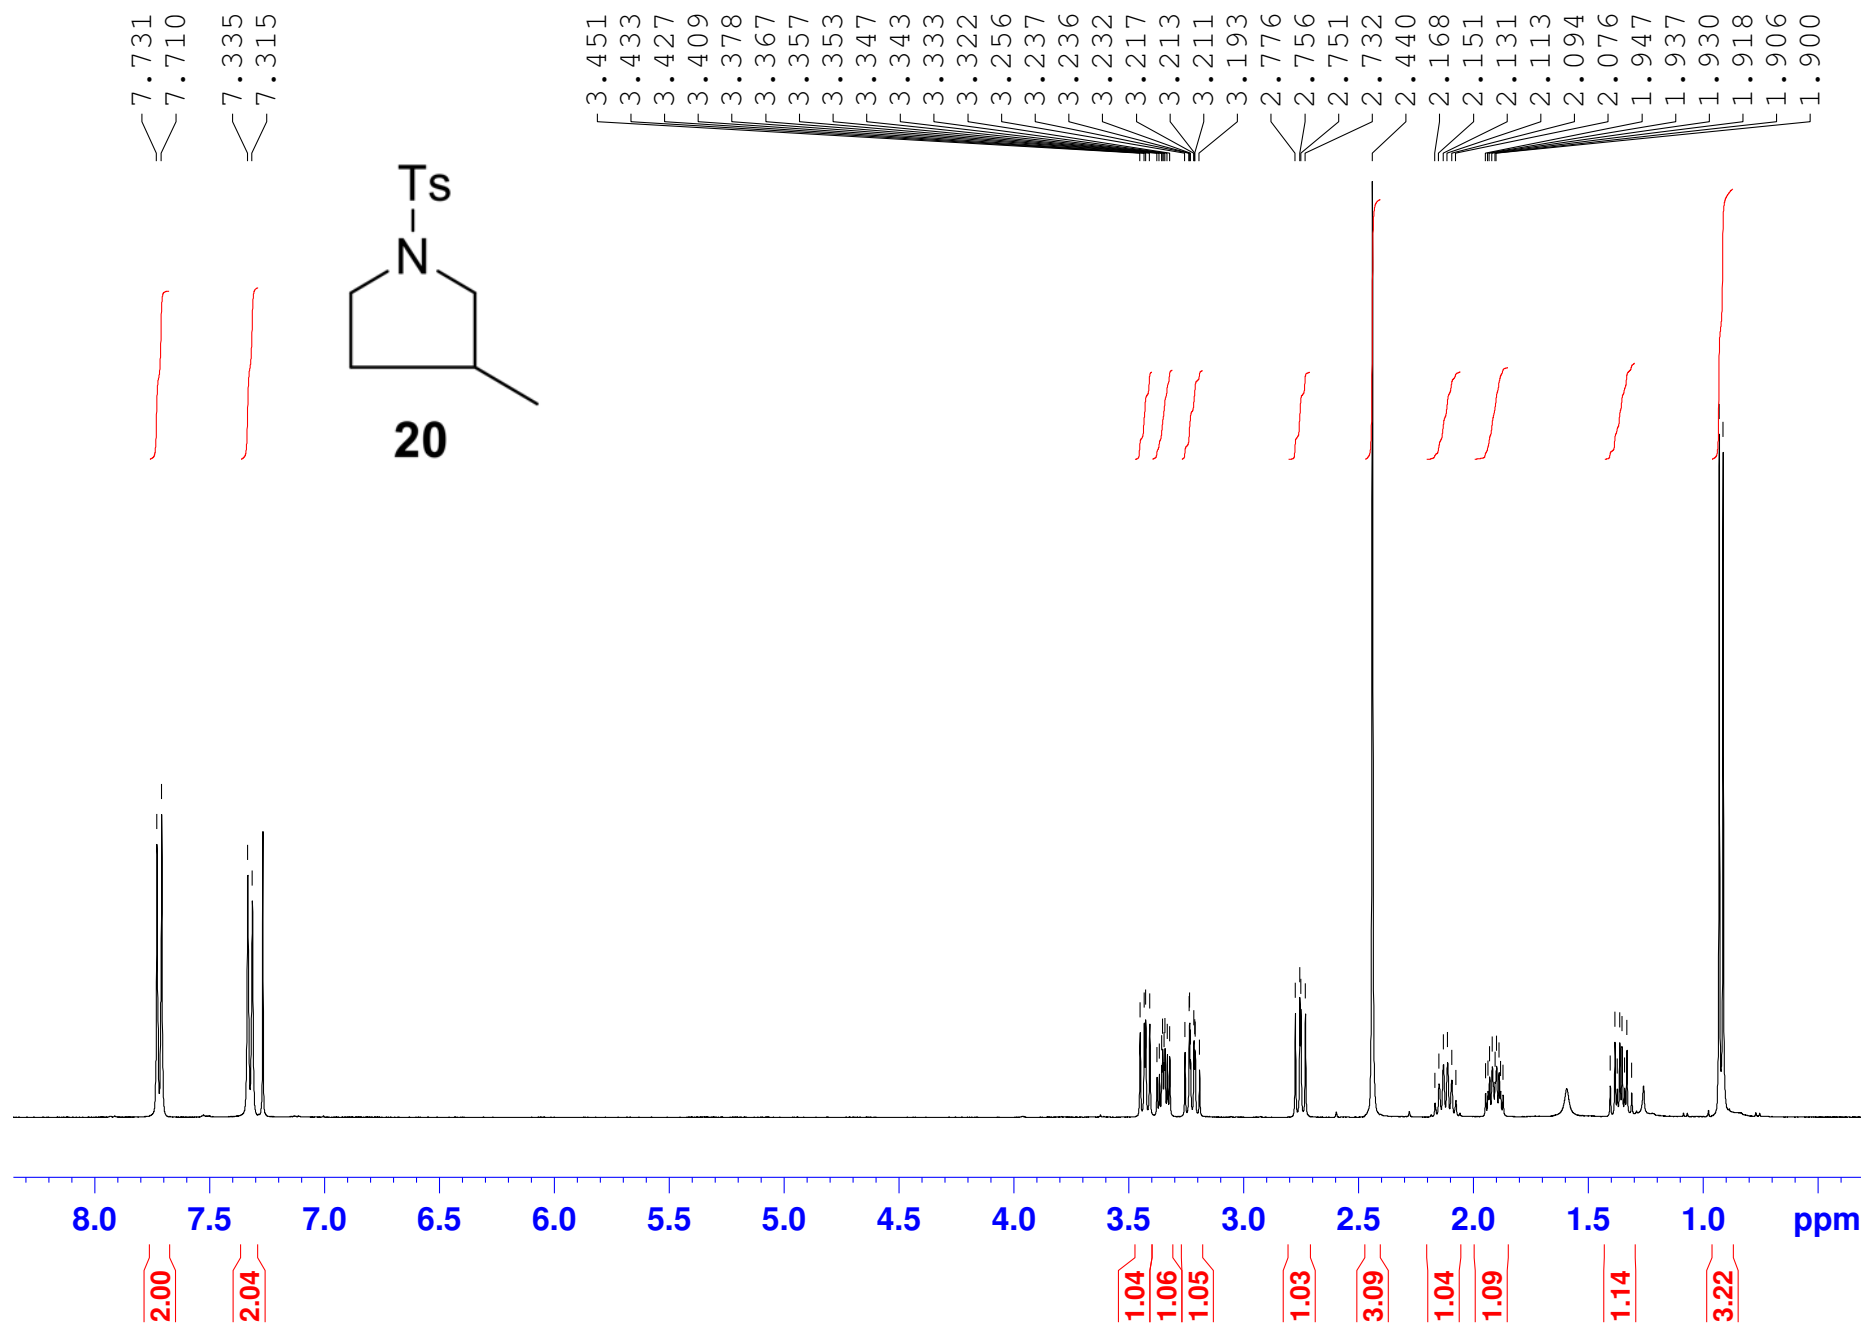

XP-98-58,  $^1\text{H}$ ,  $\text{CDCl}_3$ , ml, 301B, 2/22/2012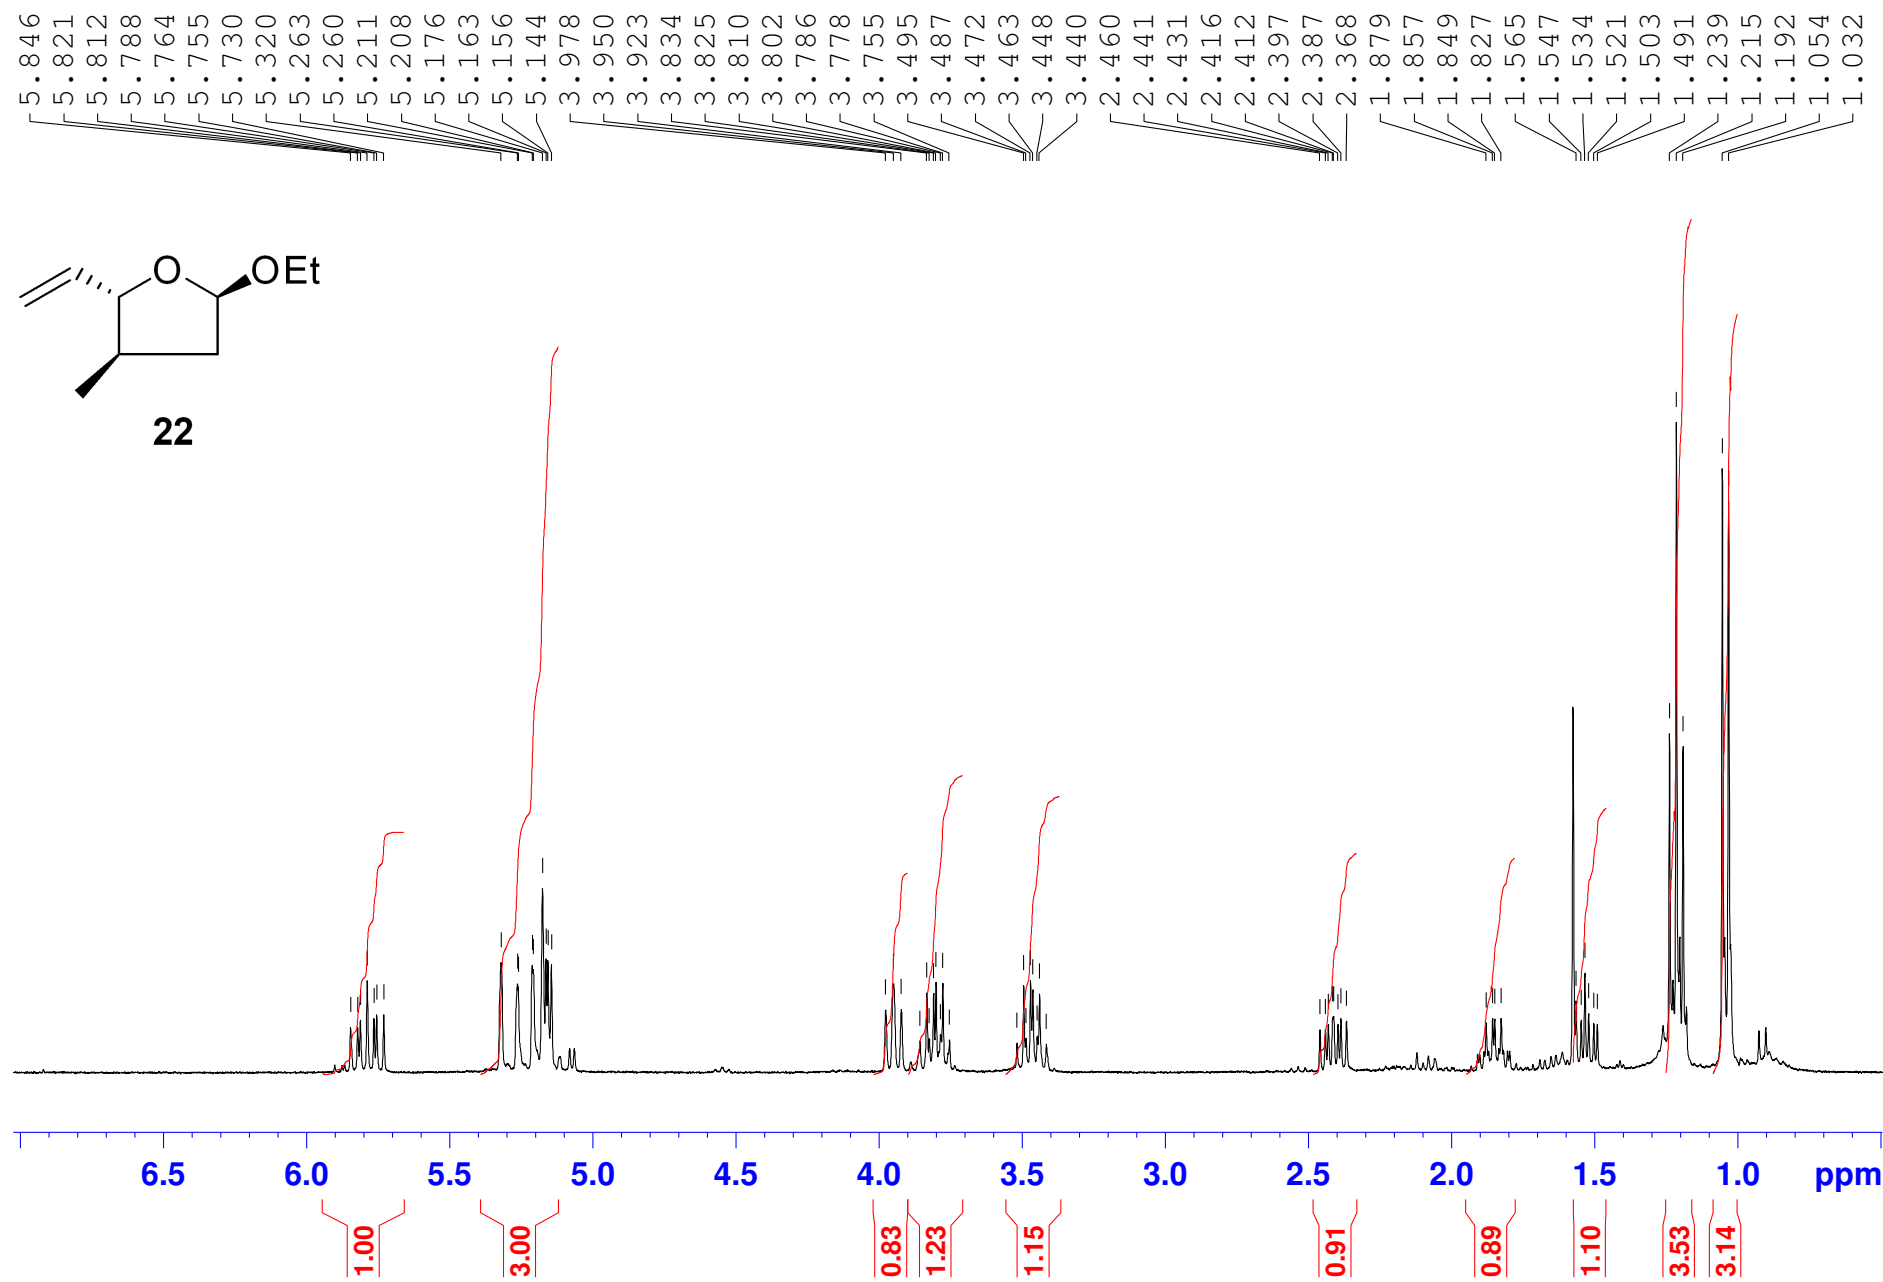



XP-66-63-13, 1H, C6D6, 400A, 1/6/2010  
PROTON C6D6 C:\Bruker\TOPSPIN curran 12

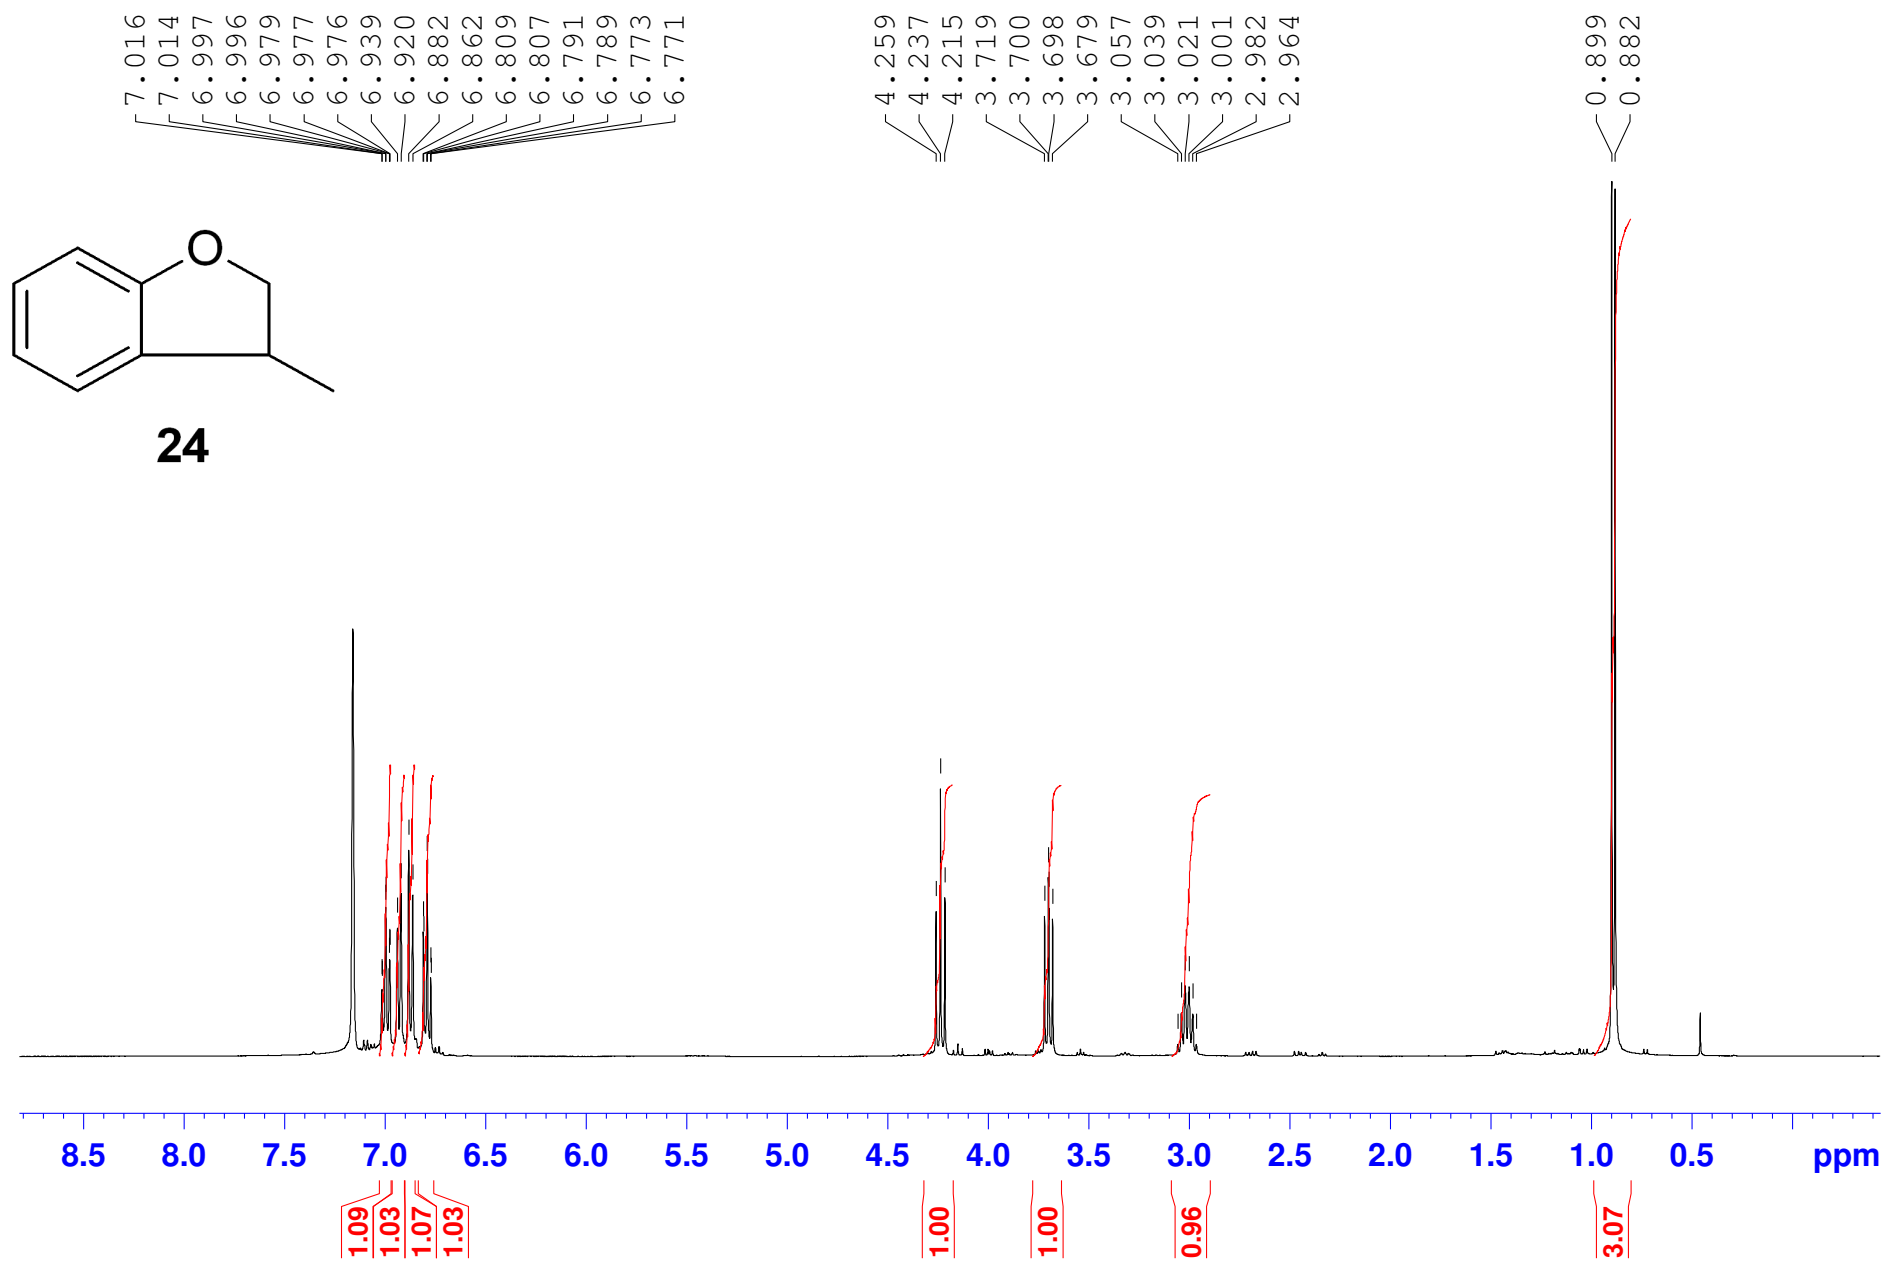

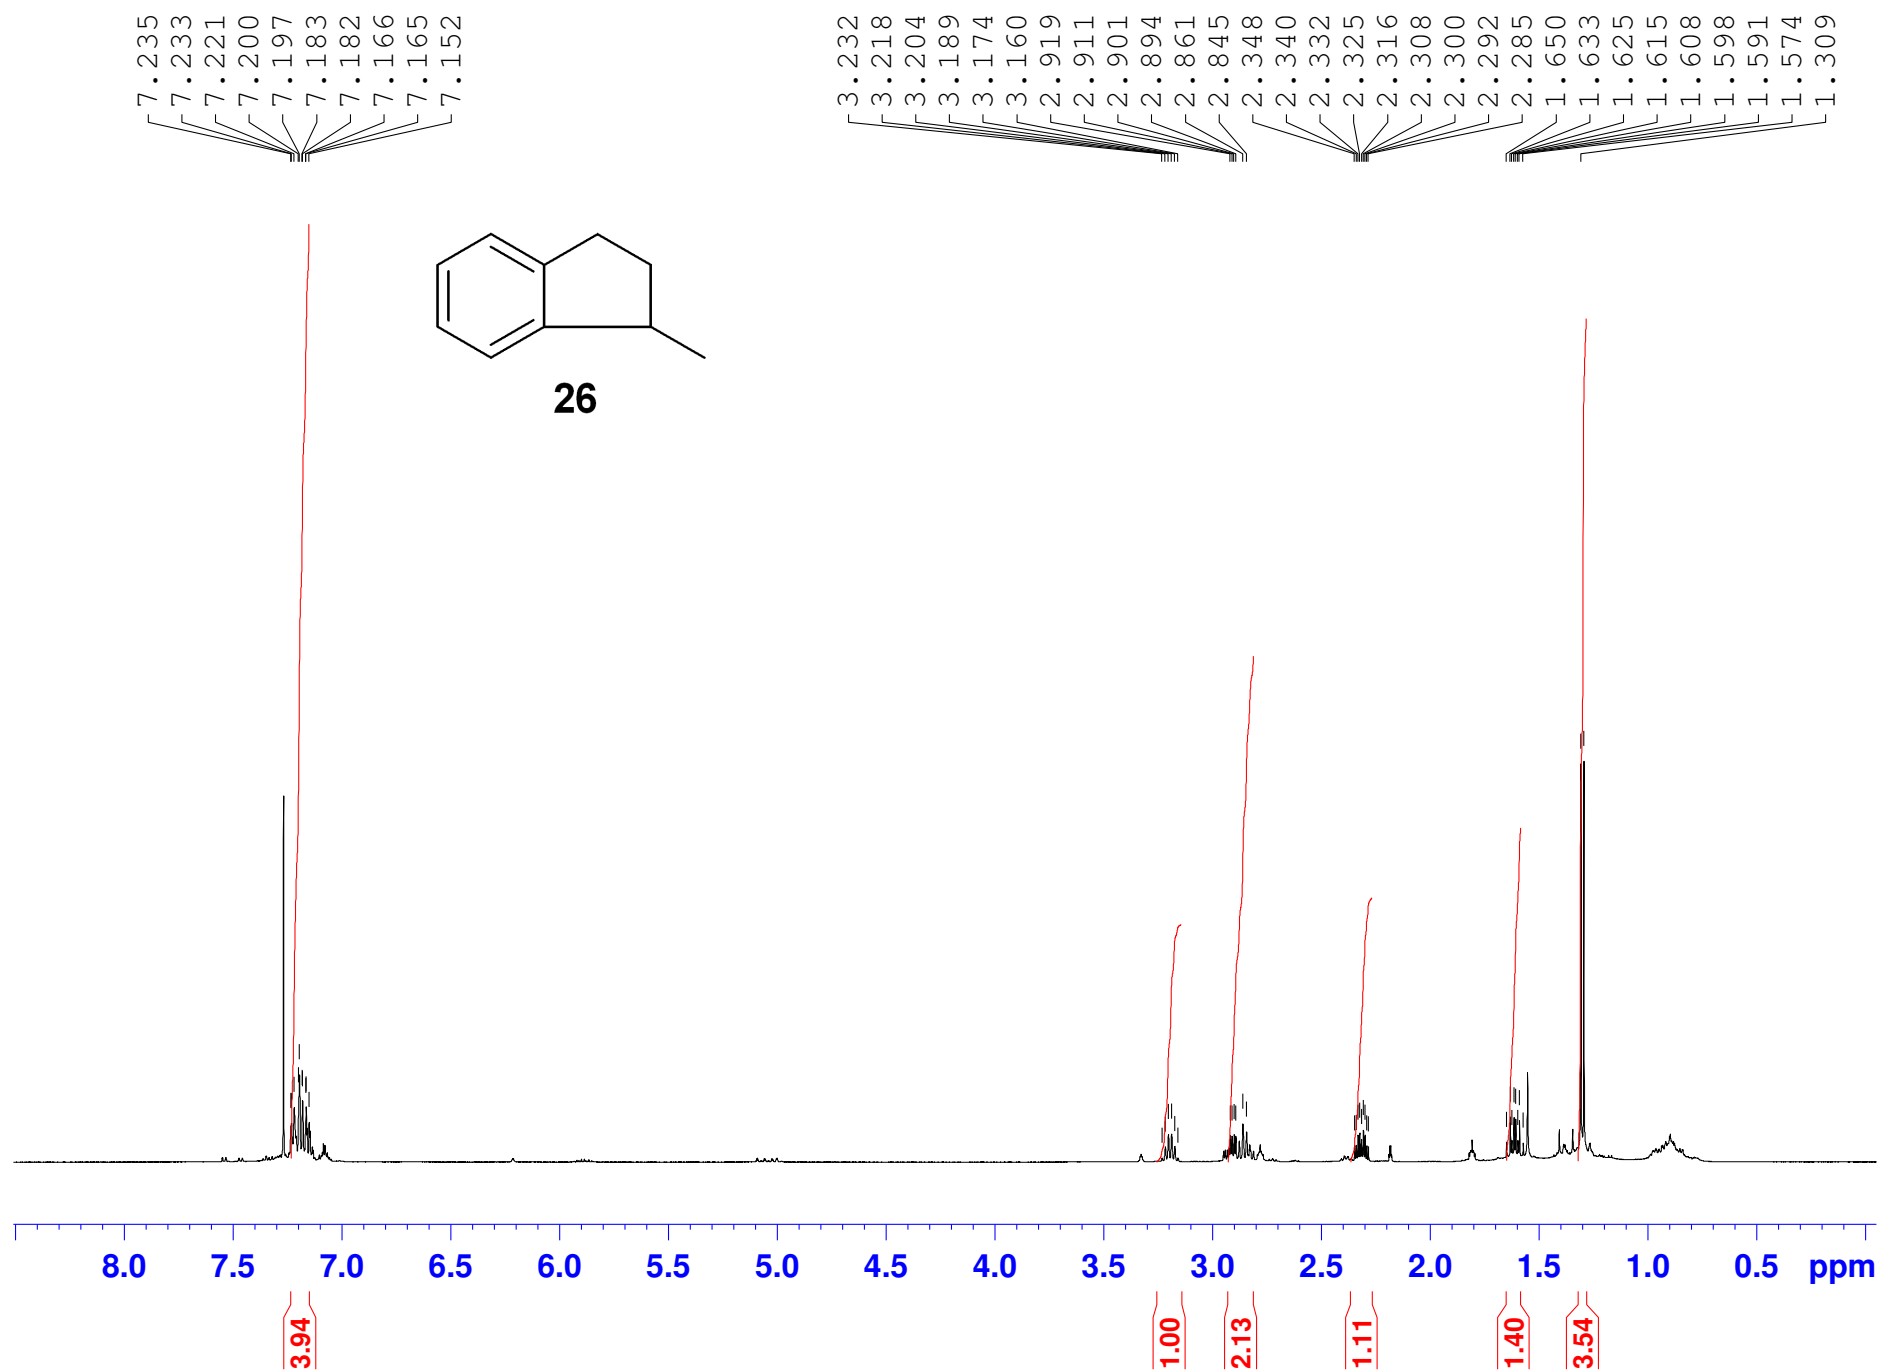

Supplement: Supplementary file 1 [file 4179622]
